# Supplementary material for: Highly selective Cu2+ detection with a naphthalimide-functionalised pillar[5]arene fluorescent chemosensor
Source: Royal Society of Chemistry journal article supplement (doi:10.1039/d3ob01558k), 2023-11-14
Supplement: d3ob01558k1.pdf [file d3ob01558k1.pdf]

## Electronic Supplementary Information

### Highly Selective Cu<sup>2+</sup> Detection with a Naphthalimide-Functionalised Pillar[5]arene Fluorescent Chemosensor

Rong Chang,<sup>a†</sup> Chan-Yu Chen,<sup>b†</sup> Liya Gao,<sup>c†</sup> Yana Li,<sup>a</sup> Zui-Harnng Lee,<sup>b</sup> Hongxia Zhao,<sup>c</sup> Andrew C.-H. Sue<sup>a</sup> and Kai-Chi Chang<sup>\*b</sup>

<sup>a</sup>College of Chemistry and Chemical Engineering, Xiamen University, 422 Siming S Rd, Siming District, Xiamen, Fujian Province 361005, P. R. China

<sup>b</sup>Bachelor Degree Program in Marine Biotechnology, National Taiwan Ocean University, Keelung 202, Taiwan, R.O.C.  
E-mail: [changkc@mail.ntou.edu.tw](mailto:changkc@mail.ntou.edu.tw)

<sup>c</sup>School of Pharmaceutical Science and Technology, Tianjin University, 92 Weijin Rd, Nankai District, Tianjin 300072, P. R. China

<sup>†</sup>Rong Chang, Chan-Yu Chen and Liya Gao contributed equally to this work.

| Page  | No. Contents                                                                                                                             |
|-------|------------------------------------------------------------------------------------------------------------------------------------------|
| S3-S4 | <b>Fig. S1-S4</b> <sup>1</sup> H NMR, <sup>13</sup> C NMR and DEPT spectra of compounds <b>1</b> and <b>2</b>                            |
| S5    | <b>Fig. S5</b> UV-vis spectra of ligands <b>1</b> and <b>2</b>                                                                           |
| S5    | <b>Fig. S6</b> Fluorescence spectra of ligand <b>1</b> in the absence and presence of 5 equiv. of 15 metal perchlorates                  |
| S6    | <b>Fig. S7</b> UV-vis spectra of ligand <b>1</b> in the absence and presence of 5 equiv. of 15 metal perchlorates                        |
| S6    | <b>Fig. S8</b> Fluorescence spectra of ligand <b>2</b> in the absence and presence of 5 equiv. of 15 metal perchlorates                  |
| S7    | <b>Fig. S9</b> UV-vis spectra of ligand <b>2</b> in the absence and presence of 5 equiv. of 15 metal perchlorates                        |
| S7    | <b>Fig. S10</b> UV-vis spectra upon the addition of various amount of Cu(ClO <sub>4</sub> ) <sub>2</sub> to ligand <b>1</b>              |
| S8    | <b>Fig. S11</b> Binding constant of ligand <b>1</b> with Cu(ClO <sub>4</sub> ) <sub>2</sub> by nonlinear least-square curve-fitting plot |
| S9    | <b>Fig. S12</b> Job plot of ligand <b>1</b> with Cu(ClO <sub>4</sub> ) <sub>2</sub>                                                      |
| S9    | <b>Fig. S13</b> The ESI-HRMS spectra of the complex <b>1</b> ·Cu <sup>2+</sup>                                                           |
| S10   | <b>Fig. S14</b> The limit of detection (LOD) of ligand <b>1</b> with Cu(ClO <sub>4</sub> ) <sub>2</sub>                                  |
| S10   | <b>Fig. S15</b> . Normalised excitation spectra of <b>1</b> and complex <b>1</b> ·Cu <sup>2+</sup>                                       |
| S11   | <b>Table S1</b> The data for the quantum yield measurement of DPA                                                                        |
| S11   | <b>Table S2</b> The data for the quantum yield measurement of ligand <b>1</b> and complex <b>1</b> ·Cu <sup>2+</sup>                     |
| S12   | <b>Fig. S16</b> DFT optimised structures of <b>1</b> with different configurations                                                       |
| S13   | <b>Fig. S17</b> DFT optimised structures of complex <b>1</b> ·Cu <sup>2+</sup>                                                           |

- S13 **Fig. S18** The ratio of fluorescence intensity of **1** in the presence of 5 equiv. of 15 metal perchlorates in CH<sub>2</sub>Cl<sub>2</sub>/CH<sub>3</sub>CN and H<sub>2</sub>O/MeOH/CHCl<sub>3</sub>
- S14 **Table S3** Dynamic light scattering (DLS) analysis for ligand **1** (5 μM) in various co-solvents, both in the absence and presence of Cu<sup>2+</sup> (10 equiv.).
- S14 **Fig. S19** Dynamic light scattering (DLS) analysis for the ligand **1** (5 μM) in CH<sub>2</sub>Cl<sub>2</sub>/CH<sub>3</sub>CN (v/v, 1:1) and H<sub>2</sub>O/MeOH/CHCl<sub>3</sub> (v/v, 1:7:2) in the absence (a) and (b) and presence of Cu<sup>2+</sup> (10 equiv.) (c) and (d).
- S15 **Fig. S20** The response times of ligand **1** (5 μM) in the presence of 5 equiv. of Cu<sup>2+</sup> in CH<sub>2</sub>Cl<sub>2</sub>/CH<sub>3</sub>CN (v/v, 1:1) at 298 K (excitation wavelength = 333 nm).
- S15 **Fig. S21** The influence of pH on the alterations in the fluorescence characteristics was investigated for ligand **1** (5 μM) in H<sub>2</sub>O/MeOH/CHCl<sub>3</sub> (v/v, 1:7:2) at 298 K (excitation wavelength = 333 nm).
- S15 **Fig. S22** The influence of pH on the alterations in the fluorescence characteristics was investigated for ligand **1** (5 μM) in the presence of 5 equiv. of Cu<sup>2+</sup> in H<sub>2</sub>O/MeOH/CHCl<sub>3</sub> (v/v, 1:7:2) at 298 K (excitation wavelength = 333 nm).
- S16 **Table S4** Cartesian-coordinates for optimised structures

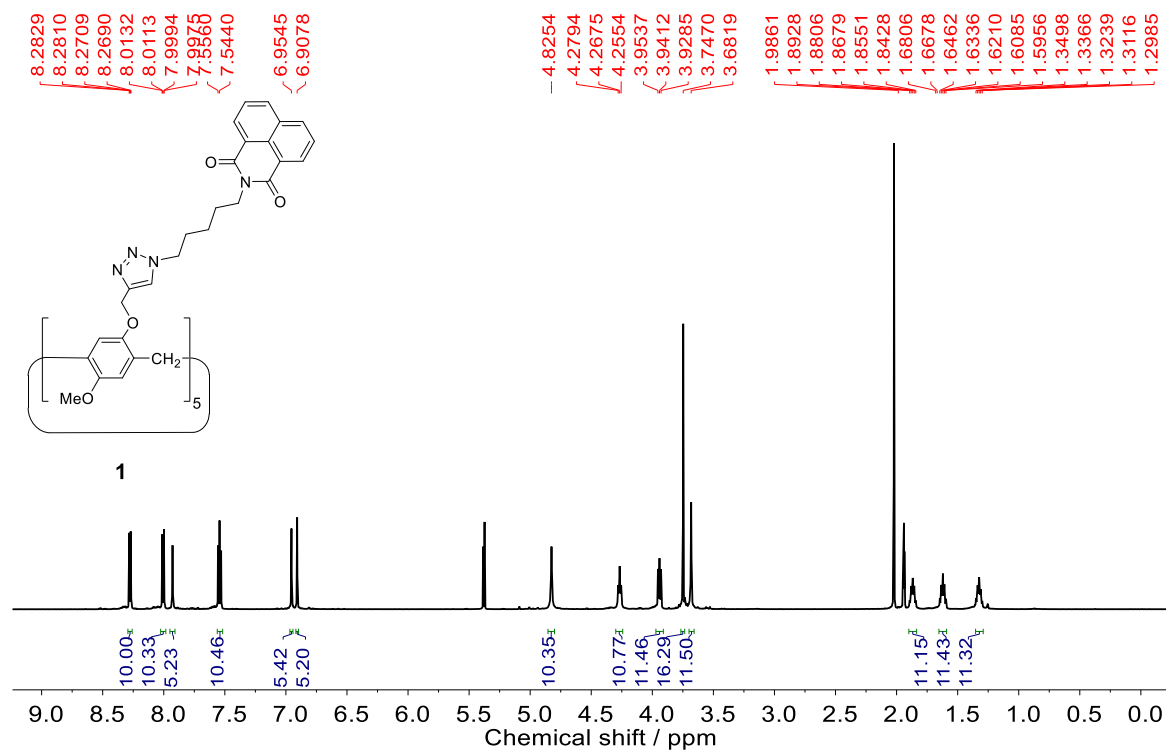

**Fig. S1** <sup>1</sup>H NMR (600 MHz, CD<sub>2</sub>Cl<sub>2</sub>/CD<sub>3</sub>CN, ν/ν = 1:1) spectrum of compound 1.

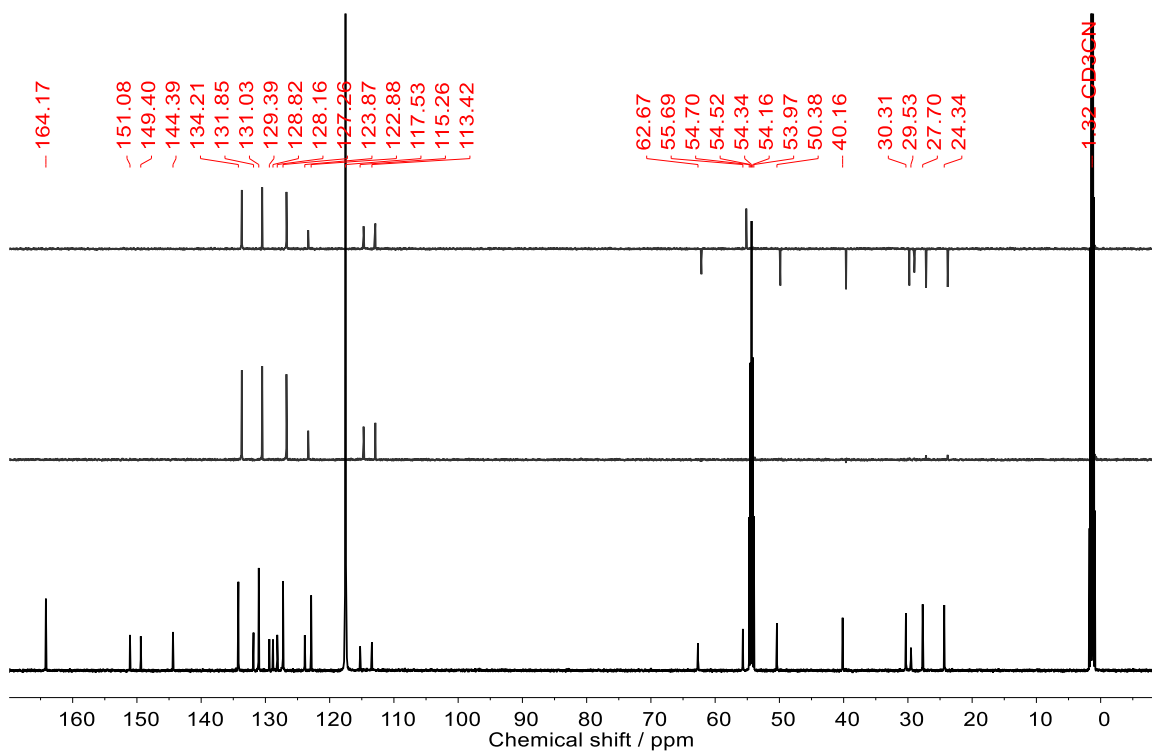

**Fig. S2** <sup>13</sup>C NMR and DEPT spectra (151 MHz, CD<sub>2</sub>Cl<sub>2</sub>/CD<sub>3</sub>CN, ν/ν = 1:1) of compound 1.

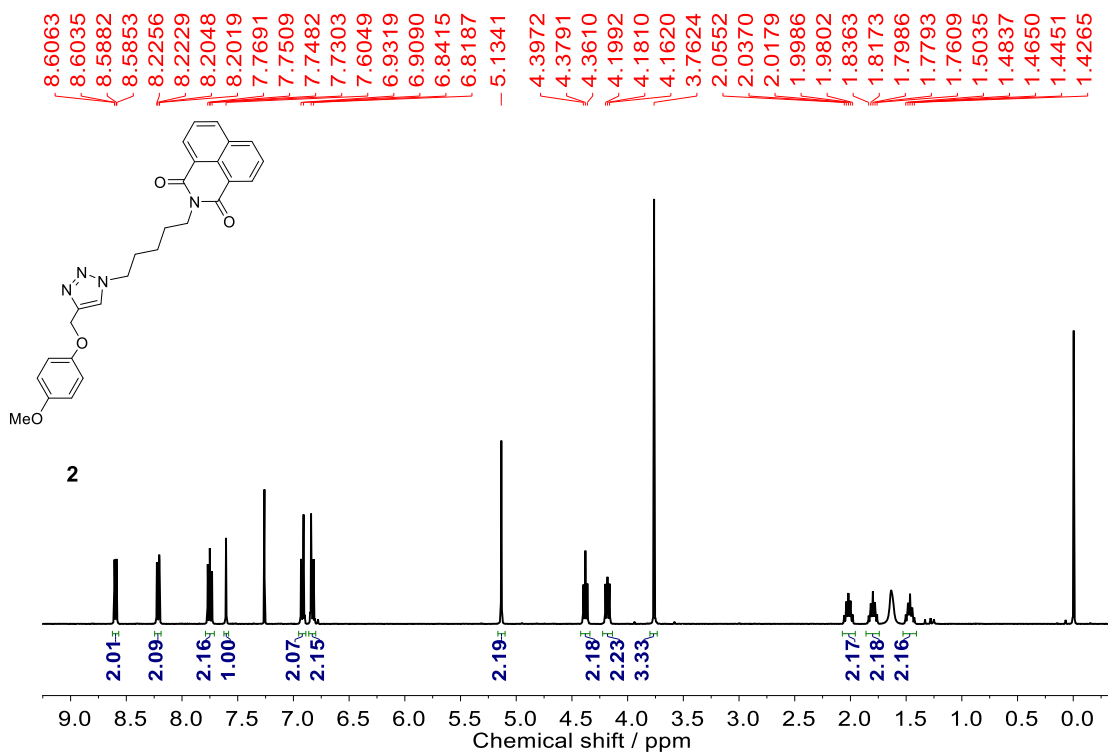

Fig. S3  $^1\text{H}$  NMR (400 MHz,  $\text{CDCl}_3$ ) spectrum of compound 2.

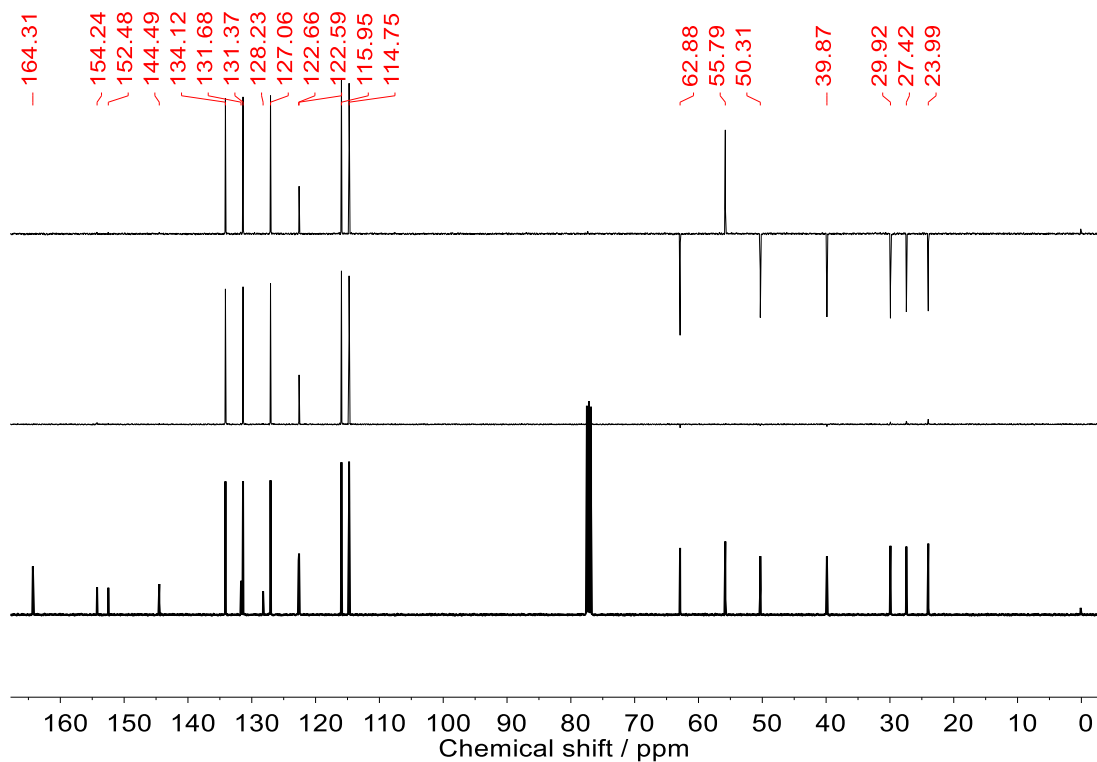

Fig. S4  $^{13}\text{C}$  NMR and DEPT spectra (101 MHz,  $\text{CDCl}_3$ ) of compound 2.

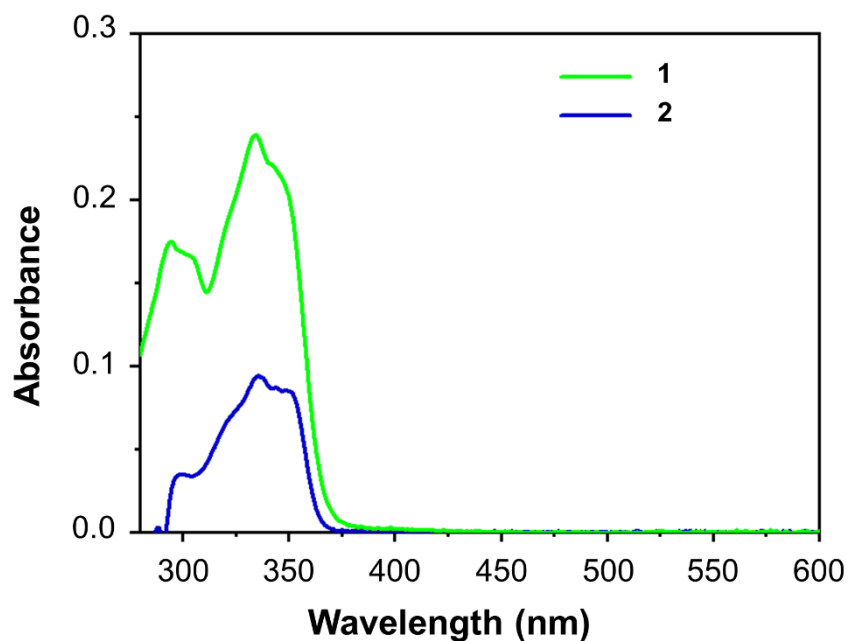

**Fig. S5** UV-vis spectra of ligands (5  $\mu\text{M}$ ) **1** and **2** in  $\text{CH}_2\text{Cl}_2/\text{CH}_3\text{CN}$  ( $v/v$ , 1:1) co-solvent at 298 K.

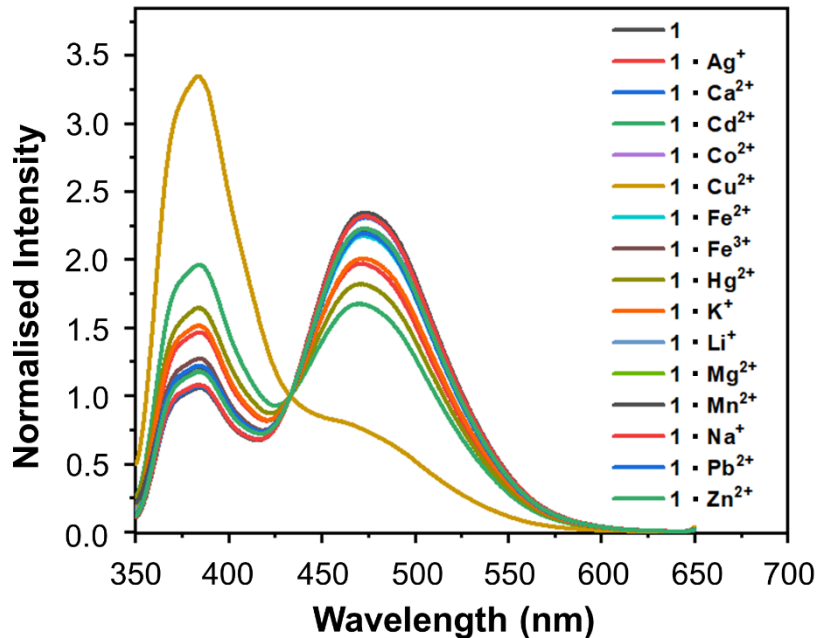

**Fig. S6** Fluorescence spectra of ligand **1** (5  $\mu\text{M}$ ) in the absence and presence of 5 equiv. of 15 metal perchlorates ( $\text{Ag}^+$ ,  $\text{Ca}^{2+}$ ,  $\text{Cd}^{2+}$ ,  $\text{Co}^{2+}$ ,  $\text{Cu}^{2+}$ ,  $\text{Fe}^{2+}$ ,  $\text{Fe}^{3+}$ ,  $\text{Hg}^{2+}$ ,  $\text{K}^+$ ,  $\text{Li}^+$ ,  $\text{Mg}^{2+}$ ,  $\text{Mn}^{2+}$ ,  $\text{Na}^+$ ,  $\text{Pb}^{2+}$  and  $\text{Zn}^{2+}$ ) in  $\text{CH}_2\text{Cl}_2/\text{CH}_3\text{CN}$  ( $v/v$ , 1:1) co-solvent at 298 K (excitation wavelength = 333 nm).

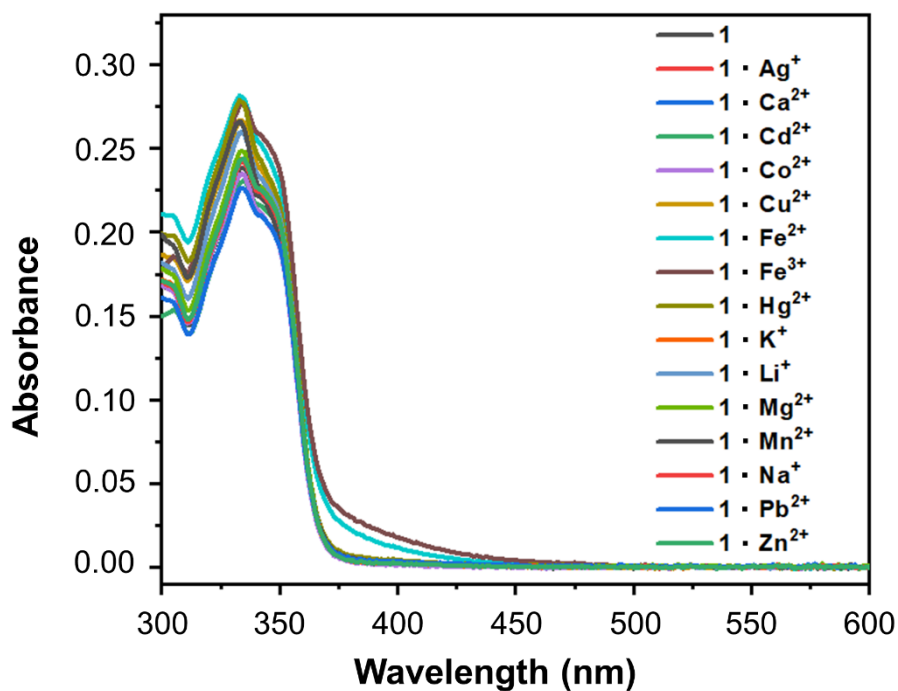

**Fig. S7** UV-vis spectra of ligand **1** (5  $\mu\text{M}$ ) in the absence and presence of 5 equiv. of 15 metal perchlorates ( $\text{Ag}^+$ ,  $\text{Ca}^{2+}$ ,  $\text{Cd}^{2+}$ ,  $\text{Co}^{2+}$ ,  $\text{Cu}^{2+}$ ,  $\text{Fe}^{2+}$ ,  $\text{Fe}^{3+}$ ,  $\text{Hg}^{2+}$ ,  $\text{K}^+$ ,  $\text{Li}^+$ ,  $\text{Mg}^{2+}$ ,  $\text{Mn}^{2+}$ ,  $\text{Na}^+$ ,  $\text{Pb}^{2+}$  and  $\text{Zn}^{2+}$ ) in  $\text{CH}_2\text{Cl}_2/\text{CH}_3\text{CN}$  ( $v/v$ , 1:1) cosolvent at 298 K.

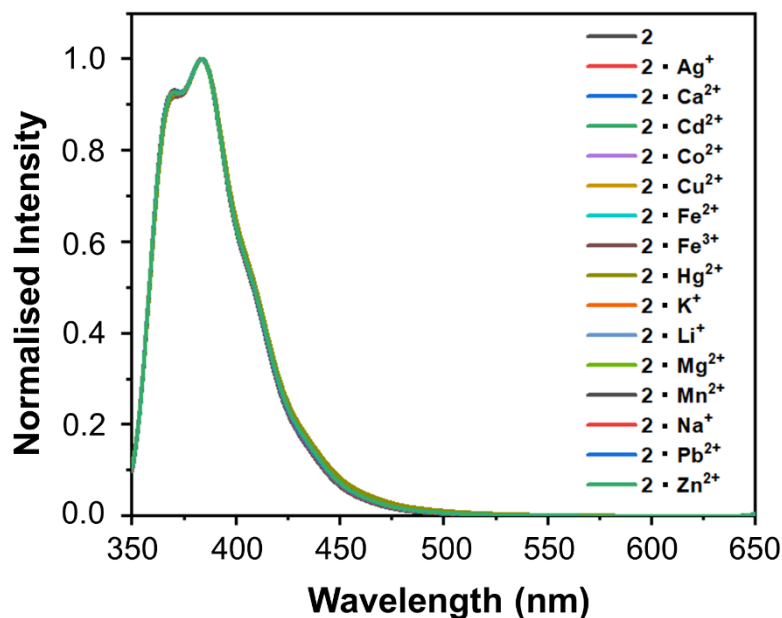

**Fig. S8** Fluorescence spectra of ligand **2** (5  $\mu\text{M}$ ) in the absence and presence of 5 equiv. of 15 metal perchlorates ( $\text{Ag}^+$ ,  $\text{Ca}^{2+}$ ,  $\text{Cd}^{2+}$ ,  $\text{Co}^{2+}$ ,  $\text{Cu}^{2+}$ ,  $\text{Fe}^{2+}$ ,  $\text{Fe}^{3+}$ ,  $\text{Hg}^{2+}$ ,  $\text{K}^+$ ,  $\text{Li}^+$ ,  $\text{Mg}^{2+}$ ,  $\text{Mn}^{2+}$ ,  $\text{Na}^+$ ,  $\text{Pb}^{2+}$  and  $\text{Zn}^{2+}$ ) in  $\text{CH}_2\text{Cl}_2/\text{CH}_3\text{CN}$  ( $v/v$ , 1:1) co-solvent at 298 K (excitation wavelength = 333 nm).

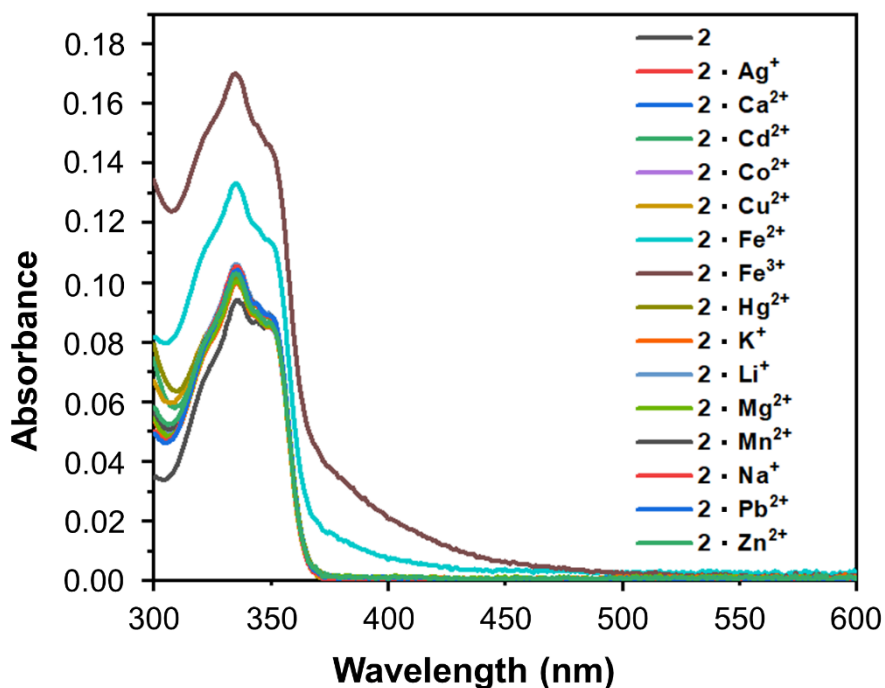

**Fig. S9** UV-vis spectra of ligand **2** (5  $\mu\text{M}$ ) in the absence and presence of 5 equiv. of 15 metal perchlorates ( $\text{Ag}^+$ ,  $\text{Ca}^{2+}$ ,  $\text{Cd}^{2+}$ ,  $\text{Co}^{2+}$ ,  $\text{Cu}^{2+}$ ,  $\text{Fe}^{2+}$ ,  $\text{Fe}^{3+}$ ,  $\text{Hg}^{2+}$ ,  $\text{K}^+$ ,  $\text{Li}^+$ ,  $\text{Mg}^{2+}$ ,  $\text{Mn}^{2+}$ ,  $\text{Na}^+$ ,  $\text{Pb}^{2+}$  and  $\text{Zn}^{2+}$ ) in  $\text{CH}_2\text{Cl}_2/\text{CH}_3\text{CN}$  ( $v/v$ , 1:1) co-solvent at 298 K.

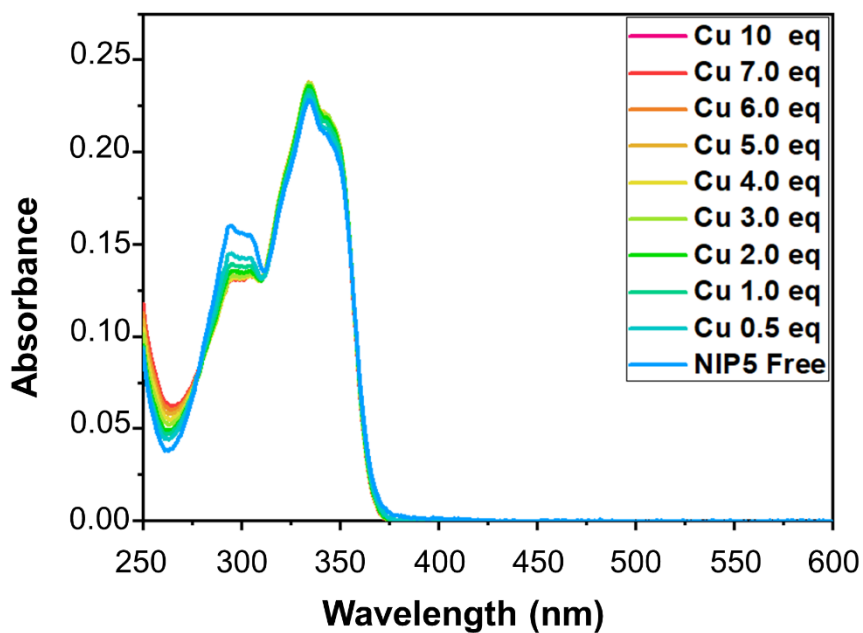

**Fig. S10** UV-vis spectra upon the addition of various amount of  $\text{Cu}(\text{ClO}_4)_2$  to ligand **1** (5  $\mu\text{M}$ ) in  $\text{CH}_2\text{Cl}_2/\text{CH}_3\text{CN}$  ( $v/v$ , 1:1) co-solvent at 298 K.

● **Nonlinear least-square curve-fitting plot**

$$I/I_0 = 1 + \frac{I_{\text{lim}}/I_0 - 1}{2} \left[ 1 + \frac{C_M}{C_H} + \frac{1}{K_a C_H} - \sqrt{\left( 1 + \frac{C_M}{C_H} + \frac{1}{K_a C_H} \right)^2 - 4 \frac{C_M}{C_H}} \right]$$

where  $I$  is fluorescent intensity of **1** in presence of  $\text{Cu}^{2+}$  ion,  $I_0$  is fluorescent intensity of **1** without  $\text{Cu}^{2+}$  ion,  $I_{\text{lim}}$  is fluorescent intensity reaching a limitation by adding excessive  $\text{Cu}^{2+}$  ion,  $C_M$  is the concentration of  $\text{Cu}^{2+}$  ion added and  $C_H$  is the concentration of **1**. By allowing  $I_{\text{lim}}/I_0$  and  $1/K_a C_H$  to be floating parameters (P1 and P2), the  $K_a$  value was obtained by a nonlinear least-squares analysis of  $I/I_0$  versus  $[\text{Cu}^{2+}]/[\mathbf{1}]$ .

**References for nonlinear least-square curve-fitting plot**

1. L. Fang, W.-H. Chan, Y.-B. He, D. W. J. Kwong and A. W. M. Lee, *J. Org. Chem.* 2005, **70**, 7640–7646.
2. B. Valeur, J. Pouget and J. Bousson, *Journal of Physical Chemistry*, 1992, **96**, 6545–6549.

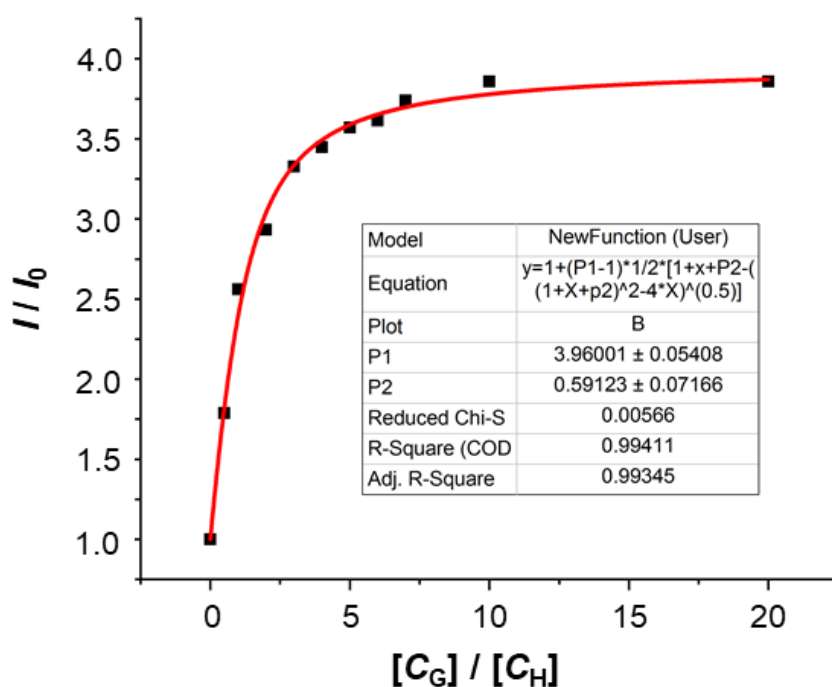

**Fig. S11** Binding constant of ligand **1** (5  $\mu\text{M}$ ) with  $\text{Cu}(\text{ClO}_4)_2$  in  $\text{CH}_2\text{Cl}_2/\text{CH}_3\text{CN}$  (v/v, 1:1) co-solvent at 298 K by nonlinear least-square curve-fitting plot.



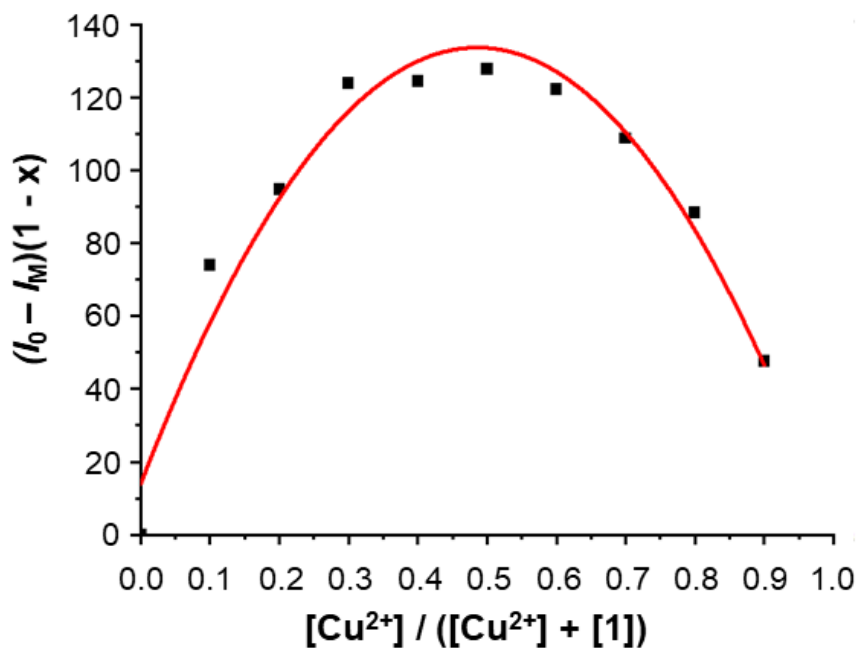

**Fig. S12** Job plot of ligand **1** (5  $\mu\text{M}$ ) with  $\text{Cu}(\text{ClO}_4)_2$  in  $\text{CH}_2\text{Cl}_2/\text{CH}_3\text{CN}$  ( $v/v$ , 1:1) co-solvent at 298 K.

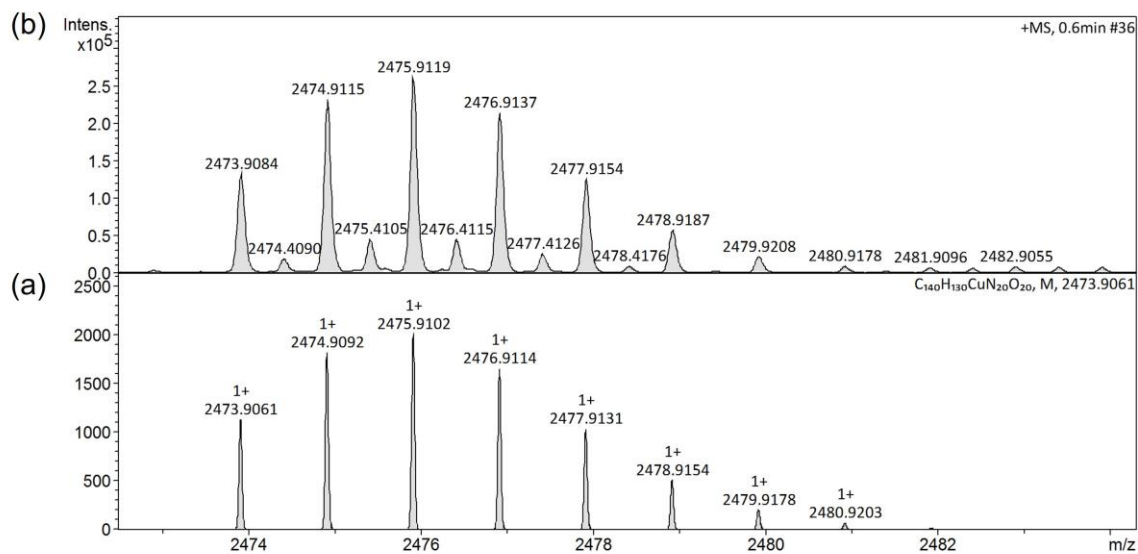

**Fig. S13** The ESI-HRMS spectra of the complex  $1 \cdot \text{Cu}^{2+}$ , where is the (a) calculated  $\text{C}_{140}\text{H}_{130}\text{CuN}_{20}\text{O}_{20}$   $m/z$  2473.9061, (b) found  $m/z$  2473.9084.

● **The limit of Detection (LOD)**

$$\text{LOD} = 3 \times \text{standard deviation/slope}$$

**References for LOD.**

1. G. L. Long and J. D. Winefordner, *Analytical Chemistry*, 1983, **55**, 712A–724A.
2. V. Thomsen, D. Schatzlein and D. Mercurio, *Spectroscopy*, 2003, **18**, 112–114.
3. H. J. Kim, J. H. Lee and J.-I. Hong, *Tetrahedron*, 2011, **52**, 4944–4946.

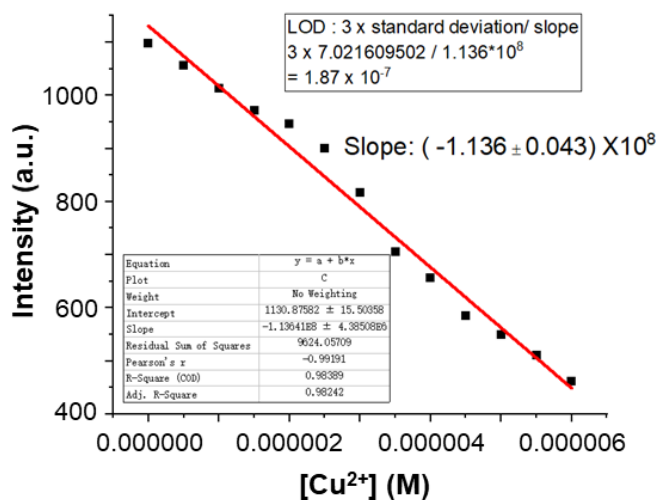

**Fig. S14** The limit of detection (LOD) of ligand **1** (5  $\mu\text{M}$ ) with  $\text{Cu}(\text{ClO}_4)_2$  in  $\text{CH}_2\text{Cl}_2/\text{CH}_3\text{CN}$  (v/v, 1:1) co-solvent at 298 K was determined to be  $3 \times 7.021 / (1.136 \pm 0.043 \times 10^8) \text{ M} = 1.854 \pm 0.070 \times 10^{-7} \text{ M} = 185 \pm 7 \text{ nM}$

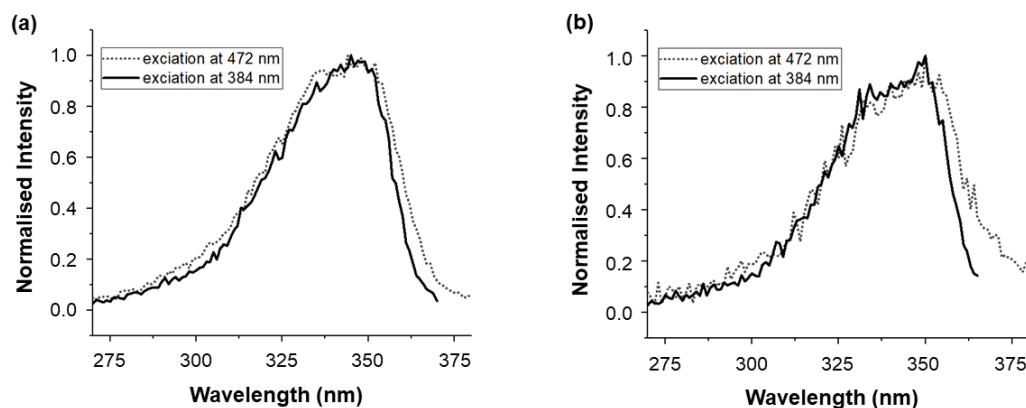

**Fig. S15** Normalised excitation spectra of (a) **1** (5  $\mu\text{M}$ ) and (b) complex **1**· $\text{Cu}^{2+}$ , monitored at 384 nm (solid line) and around 472 nm (dashed line) in  $\text{CH}_2\text{Cl}_2/\text{CH}_3\text{CN}$  (v/v, 1:1) co-solvent at 298 K (Complex **1**· $\text{Cu}^{2+}$  was formed with ligand **1** (5  $\mu\text{M}$ ) upon the addition of 10 equiv of  $\text{Cu}^{2+}$ ).

### Quantum yields ( $\Phi_F$ )

The relative fluorescent quantum yields ( $\Phi_F$ ) of (9,10-diphenylanthracene, DPA) and ligand **1** in CH<sub>2</sub>Cl<sub>2</sub>/CH<sub>3</sub>CN (v/v, 1:1) at 298 K were determined using DPA as a standard ( $\Phi_F$  of DPA in cyclohexane = 0.93 was used) based on eqn 1.  $\Phi_F = (F/F_o) \times (A_o/A) \times (n/n_o)^2 \times \Phi_F^o$  (eqn 1), where  $A$  and  $A_o$  are the absorbance of the sample and the standard at the excitation wavelength, respectively;  $F$  and  $F_o$  are the integrated fluorescence emissions of the sample and the standard, respectively; and  $n$  and  $n_o$  are solvent refractive indexes of the sample and the standard, respectively. The results are summarised in Tables S1 and S2. references for quantum yields ( $\Phi_F$ ): (a) A. M. Brouwer, Standards for photoluminescence quantum yield measurements in solution (IUPAC Technical Report), *Pure Appl. Chem.*, 2011, **83**, 2213–2228; (b) W. R. Dawson and M. W. Windsor, Fluorescence yields of aromatic compounds, *J. Phys. Chem.*, 1968, **72**, 3251–3260; (c) N. J. Turro, Modern molecular photochemistry, Benjamin Cummings, Menlo Park, 1978.

**Table S1** The data for the quantum yield measurement of DPA in cyclohexane or CH<sub>2</sub>Cl<sub>2</sub>/CH<sub>3</sub>CN (v/v, 1:1) at 298 K (excitation wavelength = 333 nm).

|                  | $A_{(333\text{ nm})}$ | $F_{(345-600\text{ nm})}$ | $F/F_o$ | $A_o/A$ | Quantum yield, $\Phi_F$ |
|------------------|-----------------------|---------------------------|---------|---------|-------------------------|
| DPA <sup>1</sup> | 0.038                 | 685446                    | 1.00    | 1.00    | 0.93                    |
| DPA              | 0.055                 | 965413                    | 1.41    | 0.69    | 0.90                    |

<sup>1</sup> The data of DPA was measured in cyclohexane.

**Table S2** The data for the quantum yield measurement of ligand **1** and complex **1**·Cu<sup>2+</sup> in CH<sub>2</sub>Cl<sub>2</sub>/CH<sub>3</sub>CN (v/v, 1:1) at 298 K using DPA as the standard (excitation wavelength = 333 nm).

|                            | $A_{(333\text{ nm})}$ | $F_{(345-600\text{ nm})}$ | $F/F_o$ | $A_o/A$ | Quantum yield, $\Phi_F$ |
|----------------------------|-----------------------|---------------------------|---------|---------|-------------------------|
| <b>1</b>                   | 0.210                 | 519691                    | 0.54    | 0.26    | 0.13                    |
| <b>1</b> ·Cu <sup>2+</sup> | 0.227                 | 483804                    | 0.50    | 0.24    | 0.11                    |
| DPA                        | 0.055                 | 965413                    | 1.00    | 1.00    | 0.90                    |

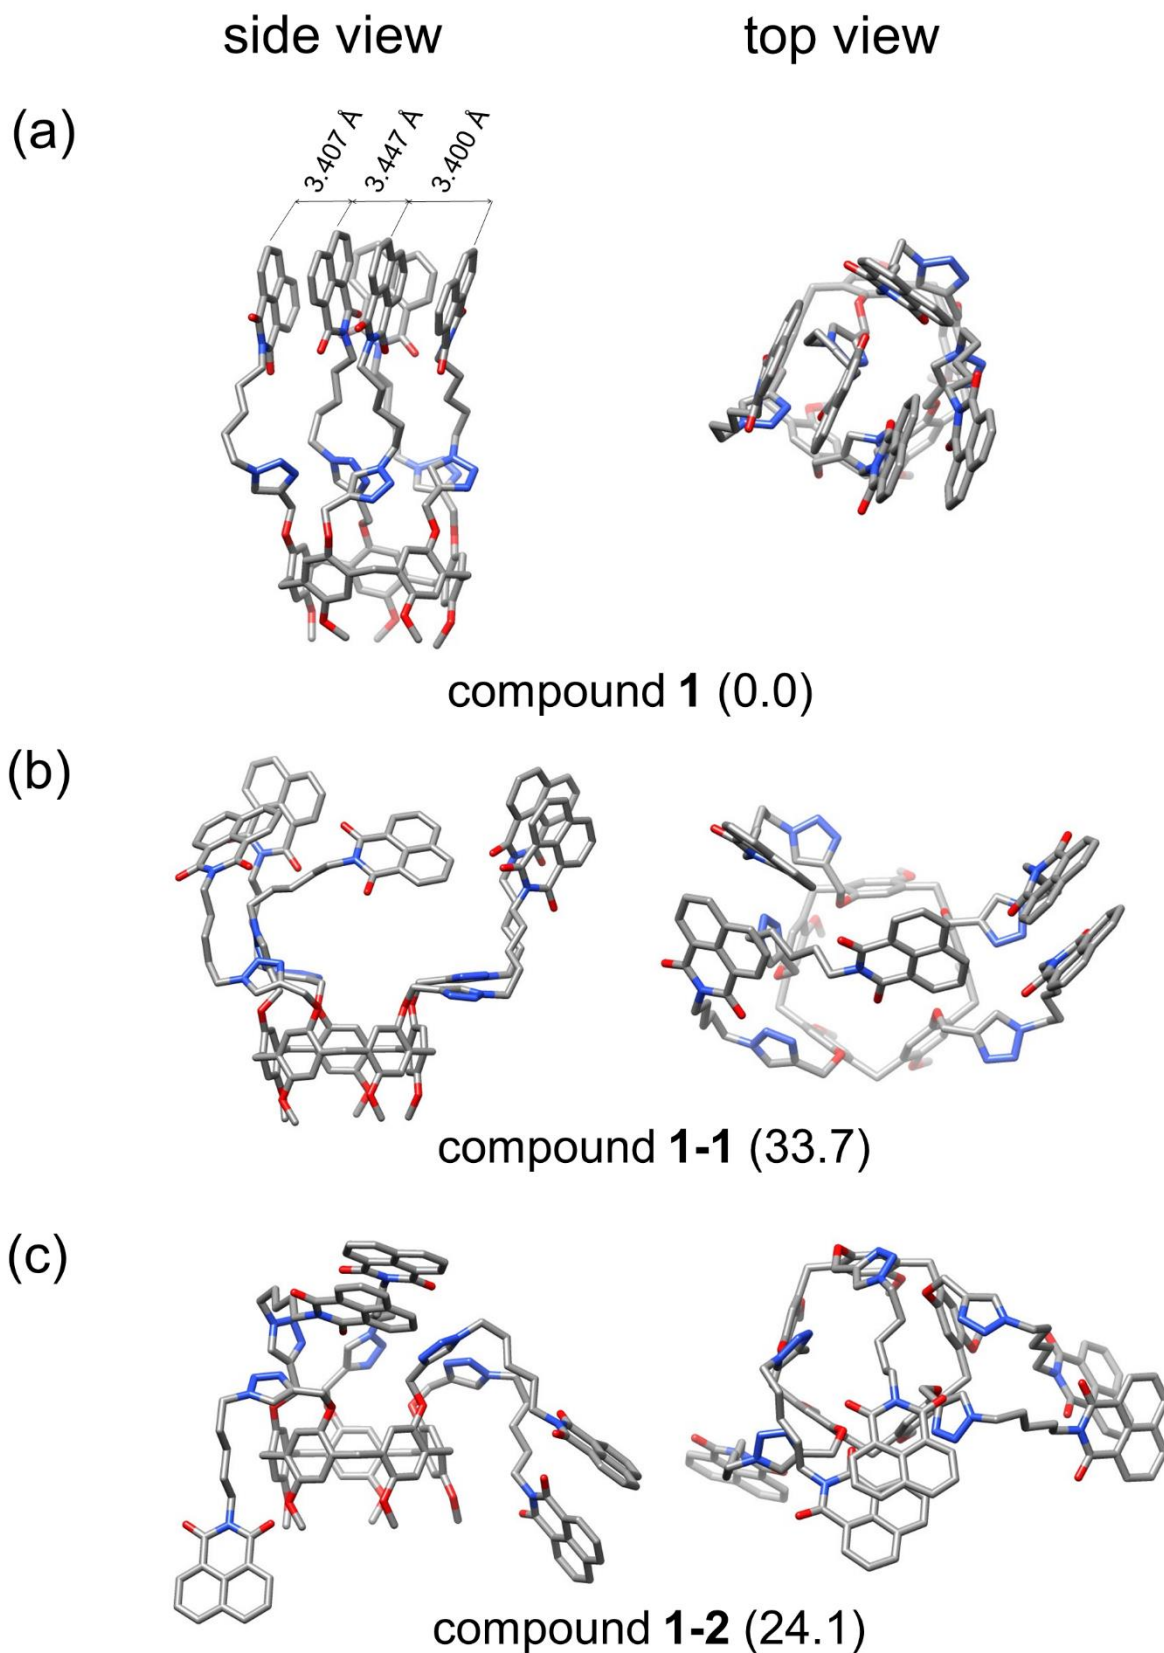

**Fig. S16** DFT optimised structures of **1** with different conformations and their relative energies were given in the brackets ( $\text{kcal mol}^{-1}$ ). Hydrogens are omitted for clarity.

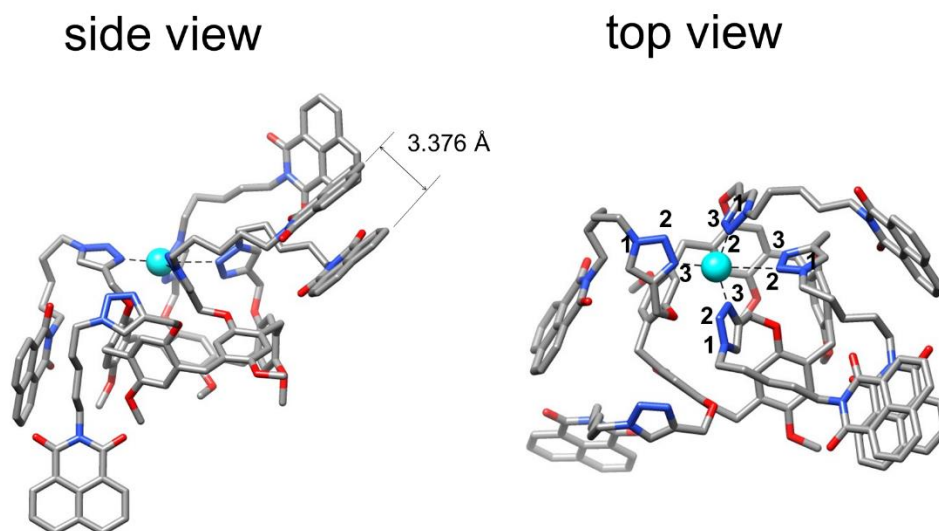

**Fig. S17** DFT optimised structures of complex **1**·Cu<sup>2+</sup>. Hydrogens are omitted for clarity.

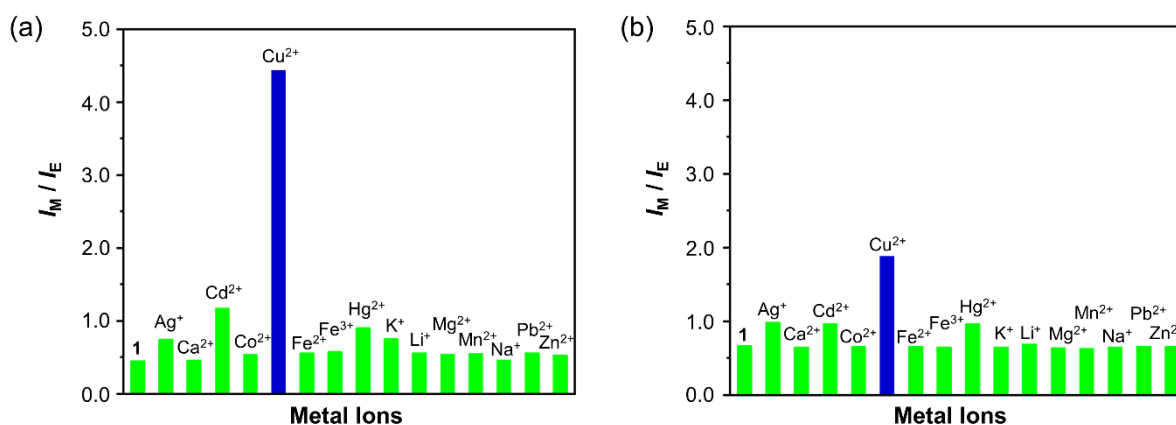

**Fig. S18** The ratio of fluorescence intensity ( $I_M/I_E$ ) of **1** (5  $\mu$ M) in the presence of 5 equiv. of 15 metal perchlorates in (a) CH<sub>2</sub>Cl<sub>2</sub>/CH<sub>3</sub>CN (v/v, 1:1) and (b) H<sub>2</sub>O/MeOH/CHCl<sub>3</sub> (v/v, 1:7:2) at 298 K (excitation wavelength = 333 nm).

**Table S3** Dynamic light scattering (DLS) analysis for ligand **1** (5  $\mu\text{M}$ ) in various co-solvents, both in the absence and presence of  $\text{Cu}^{2+}$  (10 equiv.)

| ligand <b>1</b> (NIP[5])<br>Solvent group                                         | Average size (nm) | Average St Dev (nm) | Test 1 size (nm) | St Dev (nm) | PDI   | Test 2 size (nm) | St Dev (nm) | PDI    | Test 3 size (nm) | St Dev (nm) | PDI   |
|-----------------------------------------------------------------------------------|-------------------|---------------------|------------------|-------------|-------|------------------|-------------|--------|------------------|-------------|-------|
| $\text{CH}_2\text{Cl}_2/\text{CH}_3\text{CN}$<br>(v/v, 1:1)                       | <b>206.0</b>      | 67.2                | 175.0            | 58.8        | 0.135 | 208.9            | 62.9        | 0.081  | 234.0            | 79.8        | 0.134 |
| $\text{CH}_2\text{Cl}_2/\text{CH}_3\text{CN}$<br>(v/v, 1:1) + $\text{Cu}^{2+}$    | <b>192.2</b>      | 65.0                | 190.6            | 64.2        | 0.115 | 195.0            | 63.7        | 0.106  | 191.0            | 67.1        | 0.196 |
| $\text{H}_2\text{O}/\text{MeOH}/\text{CHCl}_3$<br>(v/v, 1:7:2)                    | <b>390.6</b>      | 112.1               | 380.3            | 104.5       | 0.065 | 392.4            | 112.5       | 0.074  | 399.0            | 119.3       | 0.087 |
| $\text{H}_2\text{O}/\text{MeOH}/\text{CHCl}_3$<br>(v/v, 1:7:2) + $\text{Cu}^{2+}$ | <b>1007.7</b>     | 403.8               | 254.5            | 0.112       | 1095  | 560.6            | 0.205       | 1095.0 | 396.3            | 0.224       | 254.5 |

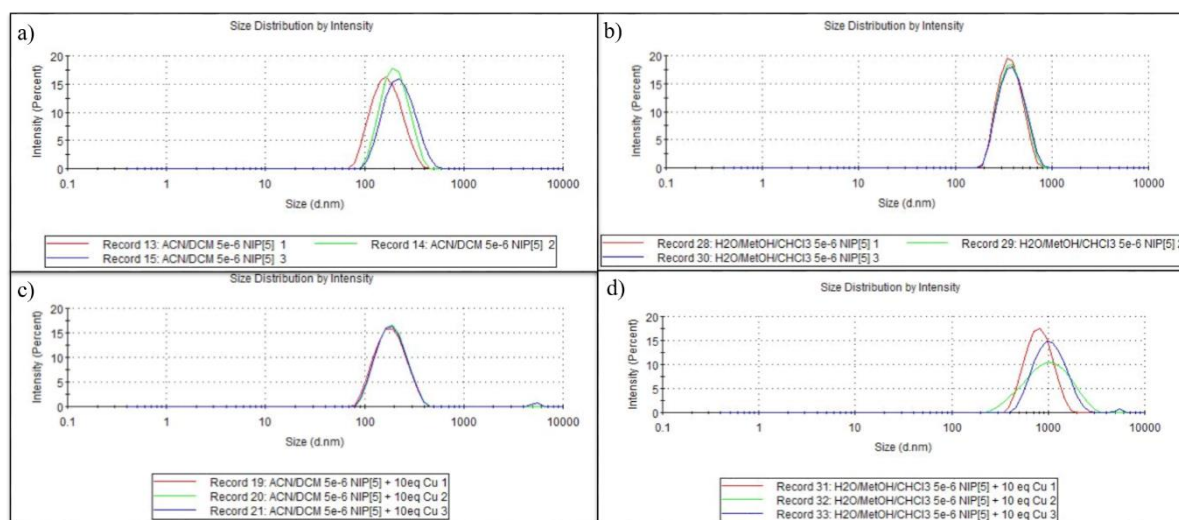

**Fig. S19** Dynamic light scattering (DLS) analysis for ligand **1** (5  $\mu\text{M}$ ) in  $\text{CH}_2\text{Cl}_2/\text{CH}_3\text{CN}$  (v/v, 1:1) and  $\text{H}_2\text{O}/\text{MeOH}/\text{CHCl}_3$  (v/v, 1:7:2) in the absence (a) and (b) and presence of  $\text{Cu}^{2+}$  (10 equiv.) (c) and (d).

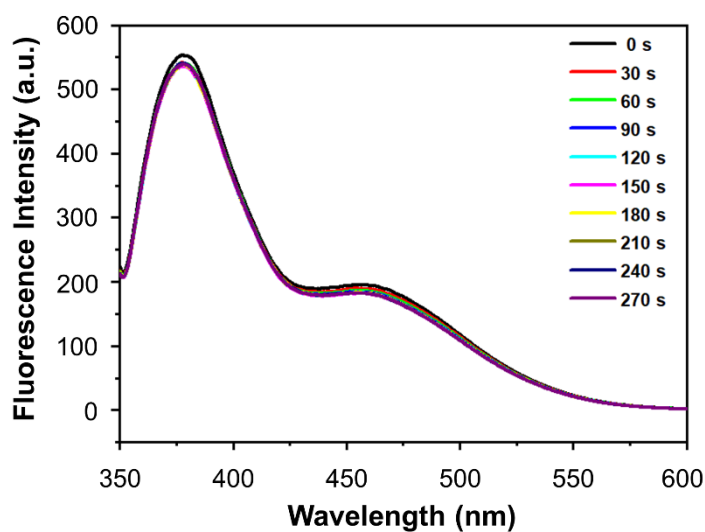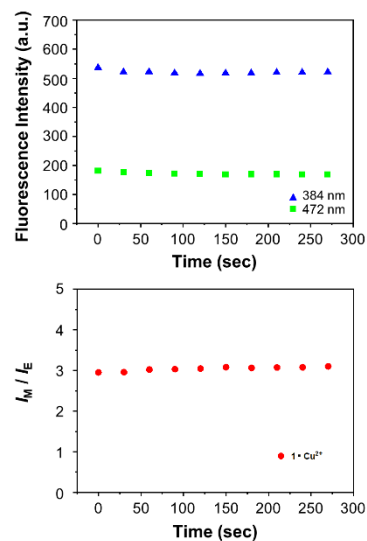

**Fig. S20** The response times of ligand **1** (5 μM) in the presence of 5 equiv. of Cu<sup>2+</sup> in CH<sub>2</sub>Cl<sub>2</sub>/CH<sub>3</sub>CN (v/v, 1:1) at 298 K (excitation wavelength = 333 nm).

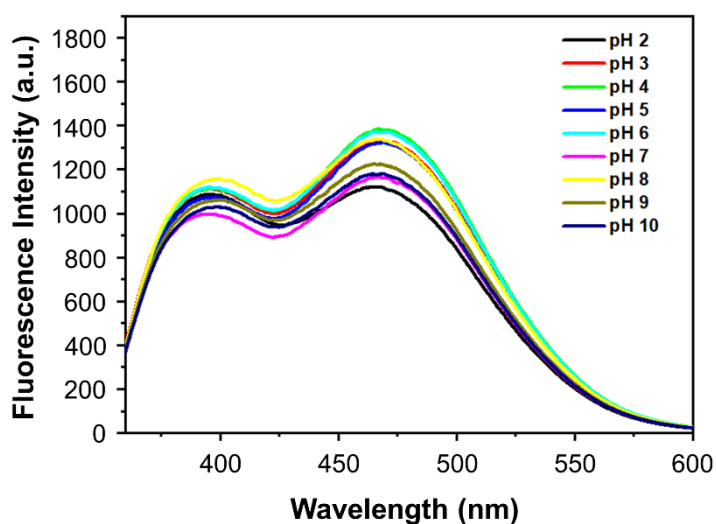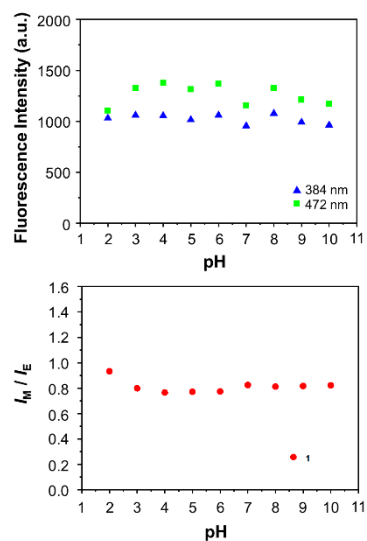

**Fig. S21** The influence of pH on the alterations in the fluorescence characteristics was investigated for ligand **1** (5 μM) in H<sub>2</sub>O/MeOH/CHCl<sub>3</sub> (v/v, 1:7:2) at 298 K (excitation wavelength = 333 nm).

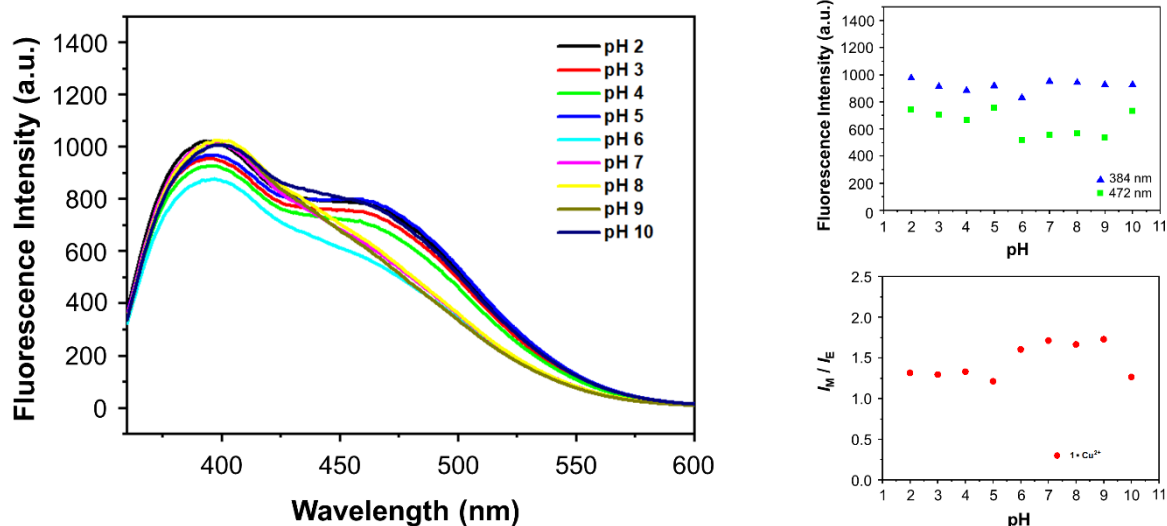

**Fig. S22** The influence of pH on the alterations in the fluorescence characteristics was investigated for ligand **1** (5  $\mu$ M) in the presence of 5 equiv. of Cu<sup>2+</sup> in H<sub>2</sub>O/MeOH/CHCl<sub>3</sub> (v/v, 1:7:2) at 298 K (excitation wavelength = 333 nm).

**Table S4.** Cartesian-coordinates for optimised structures.

|                   |            |             |             |   |            |             |             |
|-------------------|------------|-------------|-------------|---|------------|-------------|-------------|
| compound <b>1</b> |            |             |             | C | 4.83200000 | -1.32760000 | 4.07480000  |
| C                 | 7.17940000 | 3.27050000  | 2.33720000  | C | 4.45750000 | 3.54780000  | -2.42390000 |
| C                 | 4.70090000 | -2.57490000 | 3.43320000  | C | 5.89210000 | 4.93080000  | 0.87210000  |
| C                 | 6.64690000 | -1.32240000 | -3.83410000 | H | 6.81460000 | 5.51900000  | 0.88550000  |
| C                 | 6.88110000 | -4.24180000 | -0.03640000 | H | 5.07780000 | 5.62430000  | 1.09910000  |
| C                 | 4.78670000 | 2.36260000  | 3.52070000  | C | 7.21050000 | -1.34030000 | 3.79740000  |
| C                 | 5.48090000 | -3.82180000 | -1.99070000 | C | 5.74370000 | -4.37060000 | 0.78240000  |
| C                 | 5.88150000 | -3.23160000 | 3.02110000  | C | 6.13350000 | 0.67580000  | 4.92540000  |
| C                 | 4.32770000 | -3.91780000 | -1.18040000 | H | 7.08470000 | 0.76450000  | 5.45820000  |
| C                 | 4.19340000 | -1.29680000 | -4.02650000 | H | 5.34390000 | 0.75210000  | 5.67920000  |
| C                 | 5.71750000 | 4.32210000  | -0.51610000 | C | 6.63250000 | 0.05790000  | -4.04330000 |
| C                 | 6.02420000 | 1.81350000  | 3.91910000  | C | 4.80510000 | 3.39980000  | 2.56810000  |
| C                 | 5.44250000 | -2.05450000 | -3.81470000 | C | 5.86910000 | -4.56550000 | 2.28430000  |
| C                 | 4.21400000 | 0.05630000  | -4.15680000 | H | 6.79260000 | -5.10640000 | 2.50810000  |
| C                 | 5.58640000 | 3.04120000  | -3.04940000 | H | 5.04420000 | -5.19370000 | 2.63350000  |
| C                 | 4.46670000 | 4.17420000  | -1.15800000 | C | 5.41000000 | -3.53910000 | -3.49080000 |
| C                 | 6.74070000 | -3.99740000 | -1.40400000 | H | 6.24960000 | -4.04000000 | -3.98390000 |
| C                 | 7.20190000 | 2.28020000  | 3.32030000  | H | 4.49270000 | -3.97220000 | -3.90280000 |
| C                 | 6.82230000 | 3.21530000  | -2.39080000 | C | 6.87450000 | 3.85430000  | -1.15430000 |



|   |             |             |             |   |             |             |             |
|---|-------------|-------------|-------------|---|-------------|-------------|-------------|
| C | 6.05140000  | -0.68970000 | 4.26380000  | H | 3.27680000  | 0.56540000  | -4.24170000 |
| C | 4.50000000  | -4.21180000 | 0.18430000  | H | 3.35140000  | -3.77110000 | -1.59290000 |
| C | 5.48940000  | 2.28220000  | -4.36340000 | H | 3.73840000  | -3.01050000 | 3.26360000  |
| H | 6.35610000  | 2.52780000  | -4.98620000 | H | 3.86520000  | 2.00290000  | 3.92880000  |
| H | 4.60280000  | 2.62200000  | -4.90760000 | H | 3.56310000  | 4.52280000  | -0.70310000 |
| C | 7.11880000  | -2.60110000 | 3.20790000  | O | 2.99080000  | -1.97650000 | -4.03310000 |
| C | 5.95870000  | 3.86080000  | 1.95060000  | O | -7.15130000 | -4.88380000 | -2.18650000 |
| C | 5.43150000  | 0.76730000  | -4.18130000 | O | -6.23000000 | -0.48790000 | -2.87540000 |
| H | 7.85800000  | -4.33150000 | 0.39100000  | N | 0.42220000  | -2.88050000 | -5.51990000 |
| H | 8.16450000  | -0.86580000 | 3.89570000  | N | -0.36140000 | -3.92420000 | -5.66250000 |
| H | 8.09230000  | 3.58320000  | 1.87490000  | N | -0.55770000 | -4.44760000 | -4.44200000 |
| H | 7.72260000  | 2.85500000  | -2.84300000 | N | -6.70910000 | -2.66870000 | -2.46640000 |
| H | 7.57850000  | -1.82790000 | -3.68750000 | C | 1.62140000  | -1.63380000 | -3.74090000 |
| O | 7.89100000  | -3.88120000 | -2.24550000 | H | 1.38200000  | -0.81210000 | -4.19730000 |
| O | 8.28590000  | -3.27080000 | 2.72400000  | H | 1.51150000  | -1.49750000 | -2.78680000 |
| O | 8.43350000  | 1.66930000  | 3.71360000  | C | 0.73760000  | -2.74630000 | -4.20020000 |
| O | 8.11980000  | 4.01690000  | -0.47060000 | C | 0.11080000  | -3.74370000 | -3.49750000 |
| O | 7.85370000  | 0.80100000  | -4.07960000 | H | 0.13830000  | -3.90080000 | -2.58140000 |
| C | 8.91670000  | -0.04900000 | -4.51840000 | C | -1.40670000 | -5.62740000 | -4.26780000 |
| H | 9.64970000  | 0.53450000  | -5.03530000 | H | -1.20730000 | -6.04350000 | -3.41460000 |
| H | 9.36900000  | -0.52070000 | -3.67120000 | H | -1.21230000 | -6.26920000 | -4.96860000 |
| H | 8.52680000  | -0.79670000 | -5.17710000 | C | -2.89220000 | -5.25720000 | -4.31650000 |
| C | 8.98080000  | -4.60390000 | -1.66670000 | H | -3.41870000 | -6.06770000 | -4.23390000 |
| H | 9.63890000  | -4.93770000 | -2.44150000 | H | -3.08770000 | -4.86380000 | -5.18110000 |
| H | 9.51550000  | -3.96540000 | -0.99500000 | C | -3.32010000 | -4.27760000 | -3.22080000 |
| H | 8.60330000  | -5.44950000 | -1.13060000 | H | -2.80640000 | -3.45860000 | -3.29950000 |
| C | 9.42770000  | -2.83810000 | 3.46830000  | H | -3.13970000 | -4.66580000 | -2.35030000 |
| H | 10.15360000 | -3.62360000 | 3.49670000  | C | -4.81080000 | -3.95840000 | -3.33850000 |
| H | 9.85340000  | -1.97570000 | 2.99930000  | H | -5.32000000 | -4.77500000 | -3.21730000 |
| H | 9.13030000  | -2.59110000 | 4.46610000  | H | -4.99330000 | -3.62260000 | -4.23010000 |
| C | 9.52840000  | 2.48280000  | 3.28420000  | C | -5.27020000 | -2.93290000 | -2.31990000 |
| H | 10.35290000 | 2.35340000  | 3.95370000  | H | -5.09060000 | -3.26190000 | -1.42530000 |
| H | 9.82190000  | 2.19350000  | 2.29680000  | H | -4.77500000 | -2.10830000 | -2.44440000 |
| H | 9.22950000  | 3.51020000  | 3.28080000  | C | -7.58330000 | -3.75560000 | -2.38290000 |
| C | 9.16740000  | 4.20630000  | -1.42540000 | C | -9.02500000 | -3.46850000 | -2.54240000 |
| H | 9.90150000  | 4.87210000  | -1.02210000 | C | -9.45100000 | -2.15600000 | -2.88660000 |
| H | 9.62360000  | 3.26390000  | -1.64600000 | C | -8.51680000 | -1.10710000 | -3.01830000 |
| H | 8.76100000  | 4.62460000  | -2.32250000 | C | -7.08270000 | -1.34690000 | -2.78920000 |

|   |              |             |             |   |              |             |            |
|---|--------------|-------------|-------------|---|--------------|-------------|------------|
| C | -9.95020000  | -4.47250000 | -2.36860000 | C | -4.52300000  | -2.10770000 | 3.56790000 |
| H | -9.66520000  | -5.32960000 | -2.14790000 | H | -4.19210000  | -1.34790000 | 4.07200000 |
| C | -10.82620000 | -1.90060000 | -3.08550000 | H | -4.16290000  | -2.05460000 | 2.66880000 |
| C | -11.75900000 | -2.95230000 | -2.88470000 | C | -6.59710000  | -0.80710000 | 3.37460000 |
| H | -12.66810000 | -2.79230000 | -2.99770000 | C | -8.07480000  | -0.78020000 | 3.33080000 |
| C | -11.32300000 | -4.21220000 | -2.52210000 | C | -8.81090000  | -1.97770000 | 3.54720000 |
| H | -11.94120000 | -4.89190000 | -2.37880000 | C | -8.14570000  | -3.20630000 | 3.74300000 |
| C | -8.94240000  | 0.16690000  | -3.38500000 | C | -6.67570000  | -3.27610000 | 3.71420000 |
| H | -8.32450000  | 0.85770000  | -3.46270000 | C | -8.73500000  | 0.40370000  | 3.09220000 |
| C | -11.22940000 | -0.57900000 | -3.47060000 | H | -8.24830000  | 1.18410000  | 2.95580000 |
| H | -12.13020000 | -0.39260000 | -3.60840000 | C | -10.22290000 | -1.93510000 | 3.55280000 |
| C | -10.29660000 | 0.41050000  | -3.63680000 | C | -10.87670000 | -0.70240000 | 3.28890000 |
| H | -10.56700000 | 1.25410000  | -3.92040000 | H | -11.80580000 | -0.66520000 | 3.27470000 |
| O | 3.25950000   | -4.20200000 | 0.89560000  | C | -10.13960000 | 0.44210000  | 3.05280000 |
| O | -5.91440000  | 0.20570000  | 3.29560000  | H | -10.57500000 | 1.24240000  | 2.86690000 |
| O | -6.04300000  | -4.30070000 | 3.86450000  | C | -8.87620000  | -4.36690000 | 3.98370000 |
| N | 0.67420000   | -5.65120000 | 1.81290000  | H | -8.43440000  | -5.17640000 | 4.10410000 |
| N | 0.02750000   | -5.99390000 | 2.90280000  | C | -10.94450000 | -3.14740000 | 3.81210000 |
| N | 0.05520000   | -4.93950000 | 3.73330000  | H | -11.87450000 | -3.13830000 | 3.82220000 |
| N | -5.99130000  | -2.05870000 | 3.51280000  | C | -10.27290000 | -4.31850000 | 4.04500000 |
| C | 1.90260000   | -3.71660000 | 0.86140000  | H | -10.75120000 | -5.09040000 | 4.24620000 |
| H | 1.50000000   | -3.92160000 | 0.00300000  | O | 3.56780000   | -0.77500000 | 4.45070000 |
| H | 1.89310000   | -2.75410000 | 0.98200000  | O | -5.64360000  | 4.64640000  | 6.08540000 |
| C | 1.12800000   | -4.37340000 | 1.95590000  | O | -5.50690000  | 0.11040000  | 6.31690000 |
| C | 0.73290000   | -3.90420000 | 3.18280000  | N | 1.75790000   | 0.03970000  | 6.83520000 |
| H | 0.89360000   | -3.06620000 | 3.55240000  | N | 1.36140000   | 1.09960000  | 7.50080000 |
| C | -0.59850000  | -5.00750000 | 5.04140000  | N | 1.06640000   | 2.05090000  | 6.60060000 |
| H | -0.24150000  | -4.31180000 | 5.61550000  | N | -5.61160000  | 2.37130000  | 6.14240000 |
| H | -0.40650000  | -5.86490000 | 5.45230000  | C | 2.12870000   | -0.70750000 | 4.49830000 |
| C | -2.11510000  | -4.83300000 | 4.91650000  | H | 1.76560000   | -1.57140000 | 4.74880000 |
| H | -2.51300000  | -4.92010000 | 5.79690000  | H | 1.78010000   | -0.47060000 | 3.62460000 |
| H | -2.46670000  | -5.54580000 | 4.36070000  | C | 1.72730000   | 0.32270000  | 5.50180000 |
| C | -2.53410000  | -3.48810000 | 4.31710000  | C | 1.28070000   | 1.60930000  | 5.33830000 |
| H | -2.14950000  | -3.39410000 | 3.43160000  | H | 1.15370000   | 2.07290000  | 4.54220000 |
| H | -2.19740000  | -2.76710000 | 4.87170000  | C | 0.58000000   | 3.36080000  | 7.03700000 |
| C | -4.05730000  | -3.39290000 | 4.22480000  | H | 0.70210000   | 4.00370000  | 6.32100000 |
| H | -4.43250000  | -3.44590000 | 5.11770000  | H | 1.09920000   | 3.65820000  | 7.80050000 |
| H | -4.39150000  | -4.14780000 | 3.71550000  | C | -0.90170000  | 3.30550000  | 7.42160000 |

|   |              |             |             |   |              |             |             |
|---|--------------|-------------|-------------|---|--------------|-------------|-------------|
| H | -1.17490000  | 4.18080000  | 7.73810000  | H | 1.80140000   | 3.23440000  | 1.76330000  |
| H | -1.01110000  | 2.67850000  | 8.15330000  | C | 1.66030000   | 5.26580000  | 1.66690000  |
| C | -1.82220000  | 2.88740000  | 6.27210000  | C | 1.30420000   | 5.54270000  | 0.37150000  |
| H | -1.56410000  | 2.00830000  | 5.95360000  | H | 1.26300000   | 4.95430000  | -0.34750000 |
| H | -1.72960000  | 3.51470000  | 5.53810000  | C | 0.58810000   | 7.71240000  | -0.73490000 |
| C | -3.27880000  | 2.85500000  | 6.73560000  | H | 0.79980000   | 7.27350000  | -1.57360000 |
| H | -3.54250000  | 3.74620000  | 7.01350000  | H | 1.06760000   | 8.55510000  | -0.70660000 |
| H | -3.35350000  | 2.26850000  | 7.50460000  | C | -0.91810000  | 7.98310000  | -0.67030000 |
| C | -4.22530000  | 2.37410000  | 5.65260000  | H | -1.16080000  | 8.57290000  | -1.40120000 |
| H | -4.15590000  | 2.95620000  | 4.87980000  | H | -1.11740000  | 8.44280000  | 0.16000000  |
| H | -3.97620000  | 1.47730000  | 5.37960000  | C | -1.77630000  | 6.71810000  | -0.75190000 |
| C | -6.23880000  | 3.60550000  | 6.33120000  | H | -1.54880000  | 6.12430000  | -0.01940000 |
| C | -7.62930000  | 3.57970000  | 6.83330000  | H | -1.59360000  | 6.25550000  | -1.58470000 |
| C | -8.22170000  | 2.34350000  | 7.21200000  | C | -3.26210000  | 7.07190000  | -0.67940000 |
| C | -7.51830000  | 1.13040000  | 7.05670000  | H | -3.49150000  | 7.63160000  | -1.43770000 |
| C | -6.16110000  | 1.11820000  | 6.48690000  | H | -3.42700000  | 7.58230000  | 0.12880000  |
| C | -8.34320000  | 4.75120000  | 6.94360000  | C | -4.15470000  | 5.84580000  | -0.68130000 |
| H | -7.94900000  | 5.55680000  | 6.69850000  | H | -3.99500000  | 5.33010000  | -1.48720000 |
| C | -9.53320000  | 2.33240000  | 7.73710000  | H | -3.94040000  | 5.28800000  | 0.08260000  |
| C | -10.25100000 | 3.55450000  | 7.82530000  | C | -6.52600000  | 5.22110000  | -0.54770000 |
| H | -11.12060000 | 3.55740000  | 8.15500000  | C | -7.94380000  | 5.63760000  | -0.49820000 |
| C | -9.66430000  | 4.73910000  | 7.42390000  | C | -8.28330000  | 7.01070000  | -0.64660000 |
| H | -10.14590000 | 5.53310000  | 7.47170000  | C | -7.27740000  | 7.99080000  | -0.77980000 |
| C | -8.09700000  | -0.07040000 | 7.45890000  | C | -5.85480000  | 7.61370000  | -0.75450000 |
| H | -7.63340000  | -0.86890000 | 7.34720000  | C | -8.93200000  | 4.69630000  | -0.31990000 |
| C | -10.09620000 | 1.07900000  | 8.14920000  | H | -8.70400000  | 3.79960000  | -0.22780000 |
| H | -10.95740000 | 1.05240000  | 8.49950000  | C | -9.64270000  | 7.39510000  | -0.64760000 |
| C | -9.37380000  | -0.07890000 | 8.03030000  | C | -10.63980000 | 6.40410000  | -0.44670000 |
| H | -9.73650000  | -0.88000000 | 8.33320000  | H | -11.53720000 | 6.64740000  | -0.43000000 |
| O | 3.50320000   | 3.98460000  | 2.47870000  | C | -10.28350000 | 5.08020000  | -0.27580000 |
| O | -6.18030000  | 4.04720000  | -0.52630000 | H | -10.94150000 | 4.43930000  | -0.13080000 |
| O | -4.94180000  | 8.40690000  | -0.85290000 | C | -7.62250000  | 9.32840000  | -0.95450000 |
| N | 1.57740000   | 6.41560000  | 2.39520000  | H | -6.95640000  | 9.97260000  | -1.03360000 |
| N | 1.19770000   | 7.39080000  | 1.60260000  | C | -9.96350000  | 8.78020000  | -0.83820000 |
| N | 1.02590000   | 6.86810000  | 0.37810000  | H | -10.85310000 | 9.05180000  | -0.84420000 |
| N | -5.57040000  | 6.23800000  | -0.62180000 | C | -8.96830000  | 9.70560000  | -1.01140000 |
| C | 2.07100000   | 3.98510000  | 2.31530000  | H | -9.19010000  | 10.59510000 | -1.16880000 |
| H | 1.63990000   | 3.89980000  | 3.18010000  | O | 3.19610000   | 3.22630000  | -3.01590000 |

|   |              |            |             |              |              |             |             |
|---|--------------|------------|-------------|--------------|--------------|-------------|-------------|
| O | -6.87710000  | 1.52890000 | -6.73540000 | H            | -11.30070000 | 2.54070000  | -8.28070000 |
| O | -5.11160000  | 5.69010000 | -6.27140000 | C            | -7.38730000  | 6.95650000  | -7.39540000 |
| N | 1.67080000   | 4.06130000 | -5.58530000 | H            | -6.67670000  | 7.50810000  | -7.15920000 |
| N | 1.18290000   | 3.55410000 | -6.69360000 | C            | -9.61710000  | 6.71990000  | -8.27070000 |
| N | 0.56100000   | 2.40910000 | -6.37050000 | H            | -10.38770000 | 7.10610000  | -8.62050000 |
| N | -6.02940000  | 3.62110000 | -6.44460000 | C            | -8.53730000  | 7.50760000  | -7.97020000 |
| C | 1.79980000   | 3.55470000 | -3.15960000 | H            | -8.56930000  | 8.41950000  | -8.15060000 |
| H | 1.66310000   | 4.49920000 | -2.98580000 |              |              |             |             |
| H | 1.27380000   | 3.04670000 | -2.52220000 |              |              |             |             |
| C | 1.36810000   | 3.22630000 | -4.55070000 |              |              |             |             |
| C | 0.65190000   | 2.16440000 | -5.04150000 |              |              |             |             |
| H | 0.30700000   | 1.44120000 | -4.56940000 |              |              |             |             |
| C | -0.10110000  | 1.60750000 | -7.40100000 |              |              |             |             |
| H | -0.22830000  | 0.70370000 | -7.07260000 |              |              |             |             |
| H | 0.46470000   | 1.56500000 | -8.18780000 |              |              |             |             |
| C | -1.45910000  | 2.20350000 | -7.78420000 |              |              |             |             |
| H | -1.84740000  | 1.66590000 | -8.49210000 |              |              |             |             |
| H | -1.32020000  | 3.09760000 | -8.13340000 |              |              |             |             |
| C | -2.45090000  | 2.27720000 | -6.62050000 |              |              |             |             |
| H | -2.07680000  | 2.82100000 | -5.90970000 |              |              |             |             |
| H | -2.60650000  | 1.38610000 | -6.27020000 |              |              |             |             |
| C | -3.77660000  | 2.88280000 | -7.08270000 |              |              |             |             |
| H | -4.16510000  | 2.31180000 | -7.76380000 |              |              |             |             |
| H | -3.60620000  | 3.75020000 | -7.48220000 |              |              |             |             |
| C | -4.77020000  | 3.04680000 | -5.94870000 |              |              |             |             |
| H | -4.94530000  | 2.18280000 | -5.54390000 |              |              |             |             |
| H | -4.39380000  | 3.62840000 | -5.26980000 |              |              |             |             |
| C | -7.04350000  | 2.73820000 | -6.82490000 |              |              |             |             |
| C | -8.29770000  | 3.33710000 | -7.32950000 |              |              |             |             |
| C | -8.38300000  | 4.74380000 | -7.52060000 |              |              |             |             |
| C | -7.30350000  | 5.58410000 | -7.17590000 |              |              |             |             |
| C | -6.07100000  | 5.02310000 | -6.59890000 |              |              |             |             |
| C | -9.37510000  | 2.53260000 | -7.62350000 |              |              |             |             |
| H | -9.31170000  | 1.61320000 | -7.50060000 |              |              |             |             |
| C | -9.56740000  | 5.30350000 | -8.04940000 |              |              |             |             |
| C | -10.66790000 | 4.45080000 | -8.32940000 |              |              |             |             |
| H | -11.45810000 | 4.80980000 | -8.66330000 |              |              |             |             |
| C | -10.57080000 | 3.09050000 | -8.10810000 |              |              |             |             |
|   |              |            |             | compound 1-1 |              |             |             |
|   |              |            |             | C            | 7.17936131   | 3.27054934  | 2.33719439  |
|   |              |            |             | C            | 4.70089531   | -2.57487866 | 3.43316439  |
|   |              |            |             | C            | 6.64693231   | -1.32236066 | -3.83411261 |
|   |              |            |             | C            | 6.88114331   | -4.24179366 | -0.03636861 |
|   |              |            |             | C            | 4.78667831   | 2.36255034  | 3.52074439  |
|   |              |            |             | C            | 5.48086231   | -3.82179866 | -1.99072361 |
|   |              |            |             | C            | 5.88145931   | -3.23155666 | 3.02108739  |
|   |              |            |             | C            | 4.32771031   | -3.91780366 | -1.18044761 |
|   |              |            |             | C            | 4.19344561   | -1.29684097 | -4.02648105 |
|   |              |            |             | C            | 5.71747031   | 4.32212434  | -0.51606661 |
|   |              |            |             | C            | 6.02422031   | 1.81351734  | 3.91911639  |
|   |              |            |             | C            | 5.44251731   | -2.05453266 | -3.81466261 |
|   |              |            |             | C            | 4.21402931   | 0.05625134  | -4.15684461 |
|   |              |            |             | C            | 5.58644231   | 3.04123834  | -3.04936161 |
|   |              |            |             | C            | 4.46666131   | 4.17417634  | -1.15798961 |
|   |              |            |             | C            | 6.74065431   | -3.99742166 | -1.40401361 |
|   |              |            |             | C            | 7.20185731   | 2.28024934  | 3.32029939  |
|   |              |            |             | C            | 6.82228731   | 3.21530734  | -2.39077861 |
|   |              |            |             | C            | 4.83201331   | -1.32760566 | 4.07475739  |
|   |              |            |             | C            | 4.45745631   | 3.54777734  | -2.42389261 |
|   |              |            |             | C            | 5.89210531   | 4.93081434  | 0.87212839  |
|   |              |            |             | H            | 6.81458731   | 5.51899334  | 0.88545739  |
|   |              |            |             | H            | 5.07780031   | 5.62428534  | 1.09913439  |
|   |              |            |             | C            | 7.21054031   | -1.34032666 | 3.79740839  |
|   |              |            |             | C            | 5.74373331   | -4.37057966 | 0.78243339  |
|   |              |            |             | C            | 6.13350931   | 0.67584034  | 4.92537839  |
|   |              |            |             | H            | 7.08471231   | 0.76452034  | 5.45816839  |
|   |              |            |             | H            | 5.34394131   | 0.75211934  | 5.67922339  |
|   |              |            |             | C            | 6.63246131   | 0.05793634  | -4.04332361 |

|   |             |             |             |   |             |             |              |
|---|-------------|-------------|-------------|---|-------------|-------------|--------------|
| C | 4.80510231  | 3.39977434  | 2.56810339  | C | 9.52837384  | 2.48278508  | 3.28419662   |
| C | 5.86908131  | -4.56545366 | 2.28429339  | H | 10.35294436 | 2.35338251  | 3.95370273   |
| H | 6.79262431  | -5.10638866 | 2.50807939  | H | 9.82189018  | 2.19346198  | 2.29675533   |
| H | 5.04419331  | -5.19373466 | 2.63351339  | H | 9.22952701  | 3.51019889  | 3.28081649   |
| C | 5.41003931  | -3.53912566 | -3.49077361 | C | 9.16742700  | 4.20628298  | -1.42537422  |
| H | 6.24962431  | -4.04000866 | -3.98388361 | H | 9.90150913  | 4.87213234  | -1.02205293  |
| H | 4.49265831  | -3.97221966 | -3.90276261 | H | 9.62358288  | 3.26386821  | -1.64600108  |
| C | 6.87447031  | 3.85429534  | -1.15434361 | H | 8.76104589  | 4.62455554  | -2.32248204  |
| C | 6.05135631  | -0.68967266 | 4.26382539  | H | 3.27675144  | 0.56537635  | -4.24170871  |
| C | 4.50003931  | -4.21184866 | 0.18429239  | H | 3.35136428  | -3.77108873 | -1.59290750  |
| C | 5.48944631  | 2.28222834  | -4.36336261 | H | 3.73840794  | -3.01049238 | 3.26358037   |
| H | 6.35607631  | 2.52778534  | -4.98619861 | H | 3.86523954  | 2.00287658  | 3.92877060   |
| H | 4.60283531  | 2.62200734  | -4.90761061 | H | 3.56309074  | 4.52276912  | -0.70307941  |
| C | 7.11875231  | -2.60113566 | 3.20787939  | O | 2.99078496  | -1.97653532 | -4.03310292  |
| C | 5.95869531  | 3.86076534  | 1.95064139  | O | -1.63841007 | -3.70199079 | -13.53666259 |
| C | 5.43145131  | 0.76725234  | -4.18133861 | O | -4.00335691 | -1.53890019 | -10.31551353 |
| H | 7.85796529  | -4.33153987 | 0.39102399  | N | 2.63184580  | -0.67030654 | -6.82421001  |
| H | 8.16450913  | -0.86579342 | 3.89570225  | N | 2.96401602  | -0.84245130 | -8.08263771  |
| H | 8.09229276  | 3.58317817  | 1.87489646  | N | 2.79030911  | -2.14255528 | -8.36866918  |
| H | 7.72262859  | 2.85504630  | -2.84299268 | N | -2.86717396 | -2.67190354 | -11.92124187 |
| H | 7.57853394  | -1.82786758 | -3.68754810 | C | 1.82202973  | -1.97773968 | -4.87689467  |
| O | 7.89101426  | -3.88118333 | -2.24547700 | H | 1.24993360  | -1.22804709 | -4.64980235  |
| O | 8.28592118  | -3.27079402 | 2.72396356  | H | 1.32007475  | -2.79718643 | -4.74460435  |
| O | 8.43350115  | 1.66930436  | 3.71361822  | C | 2.25608326  | -1.87235496 | -6.30167287  |
| O | 8.11984208  | 4.01689861  | -0.47059707 | C | 2.34917933  | -2.82438283 | -7.28475496  |
| O | 7.85372386  | 0.80097067  | -4.07962472 | H | 2.15378265  | -3.73139284 | -7.22162528  |
| C | 8.91672752  | -0.04896736 | -4.51840549 | C | 3.06893893  | -2.65070117 | -9.71295933  |
| H | 9.64972515  | 0.53452879  | -5.03526786 | H | 3.18487936  | -3.61299111 | -9.67500940  |
| H | 9.36902437  | -0.52073990 | -3.67119936 | H | 3.89502180  | -2.26052865 | -10.03892588 |
| H | 8.52682701  | -0.79665833 | -5.17706761 | C | 1.93184798  | -2.31488651 | -10.68267618 |
| C | 8.98077506  | -4.60392725 | -1.66671743 | H | 2.17038895  | -2.63557983 | -11.56654866 |
| H | 9.63892952  | -4.93769758 | -2.44152714 | H | 1.83861097  | -1.35082298 | -10.73259480 |
| H | 9.51552896  | -3.96540043 | -0.99498700 | C | 0.58328783  | -2.92083519 | -10.28567744 |
| H | 8.60328176  | -5.44947793 | -1.13058047 | H | 0.32966856  | -2.59913356 | -9.40642209  |
| C | 9.42765400  | -2.83806840 | 3.46833894  | H | 0.66168783  | -3.88677964 | -10.24378535 |
| H | 10.15363334 | -3.62359518 | 3.49665262  | C | -0.49578870 | -2.53947054 | -11.29958861 |
| H | 9.85335324  | -1.97571505 | 2.99926874  | H | -0.25616775 | -2.90002063 | -12.16762061 |
| H | 9.13027861  | -2.59110738 | 4.46607545  | H | -0.53016440 | -1.57315745 | -11.37705056 |

|   |             |             |              |   |              |             |             |
|---|-------------|-------------|--------------|---|--------------|-------------|-------------|
| C | -1.86875838 | -3.05403052 | -10.91191529 | H | -0.67339459  | -8.42113881 | -4.06343288 |
| H | -1.84198771 | -4.02040087 | -10.83230623 | H | -0.78095074  | -6.86421327 | -3.92000918 |
| H | -2.12125174 | -2.68615268 | -10.05071373 | C | -1.48406995  | -7.85463284 | -2.25711949 |
| C | -2.63817020 | -3.05931376 | -13.24408396 | H | -1.36931511  | -7.11282566 | -1.64274332 |
| C | -3.65008756 | -2.65643094 | -14.24404530 | H | -1.26263659  | -8.67395870 | -1.78741471 |
| C | -4.72629965 | -1.80984629 | -13.85978917 | C | -2.93908701  | -7.91061800 | -2.72365145 |
| C | -4.87503374 | -1.39803168 | -12.51868600 | H | -3.05600513  | -8.67873936 | -3.30435264 |
| C | -3.92635392 | -1.84708220 | -11.48668710 | H | -3.13700851  | -7.11351991 | -3.23979554 |
| C | -3.54310378 | -3.09140636 | -15.54546688 | C | -3.91846896  | -8.00894151 | -1.56985259 |
| H | -2.83480739 | -3.64118745 | -15.79157051 | H | -3.72635833  | -8.80418026 | -1.04868590 |
| C | -5.66166247 | -1.38911750 | -14.83134078 | H | -3.81698911  | -7.23648095 | -0.99213150 |
| C | -5.53457113 | -1.86594192 | -16.16289950 | C | -6.27465852  | -8.60950498 | -1.22528407 |
| H | -6.15318989 | -1.60807057 | -16.80765057 | C | -7.65522431  | -8.67084475 | -1.75110678 |
| C | -4.49674513 | -2.71104131 | -16.50556762 | C | -7.91508568  | -8.30472794 | -3.10055903 |
| H | -4.42856192 | -3.03010195 | -17.37637739 | C | -6.87891779  | -7.82397463 | -3.92851024 |
| C | -5.91534354 | -0.54494999 | -12.15997500 | C | -5.50955681  | -7.67897855 | -3.40842546 |
| H | -6.01492393 | -0.28235858 | -11.27332398 | C | -8.68324659  | -9.09202986 | -0.93862875 |
| C | -6.71634053 | -0.50375786 | -14.42956764 | H | -8.50634351  | -9.33422656 | -0.05854006 |
| H | -7.34012021 | -0.21419226 | -15.05583146 | C | -9.22823203  | -8.41277028 | -3.61026714 |
| C | -6.81096664 | -0.08192345 | -13.12960970 | C | -10.27131524 | -8.83596775 | -2.74456299 |
| H | -7.47853699 | 0.51939303  | -12.88901100 | H | -11.14238964 | -8.89620049 | -3.06470695 |
| O | 3.25951119  | -4.20202850 | 0.89555433   | C | -9.99887705  | -9.15860908 | -1.42912495 |
| O | -5.97465829 | -9.00571265 | -0.10672443  | H | -10.68976266 | -9.42139458 | -0.86487400 |
| O | -4.57674435 | -7.26230211 | -4.06324970  | C | -7.13924101  | -7.49696584 | -5.25665311 |
| N | 1.53934028  | -4.42455873 | -1.67676798  | H | -6.45527508  | -7.17250063 | -5.79696176 |
| N | 1.30788430  | -5.23470200 | -2.68359823  | C | -9.45997403  | -8.07559840 | -4.98512709 |
| N | 1.20803245  | -6.47666690 | -2.18378702  | H | -10.31751506 | -8.14284492 | -5.33904374 |
| N | -5.29991047 | -8.07092260 | -2.06922475  | C | -8.42667258  | -7.65516975 | -5.78031067 |
| C | 1.85206285  | -4.49287448 | 0.78387382   | H | -8.58305555  | -7.47282662 | -6.67887327 |
| H | 1.33945116  | -3.67140391 | 0.84148672   | O | 3.61175166   | -0.70240216 | 4.48093727  |
| H | 1.57708978  | -5.07693931 | 1.50789773   | O | -2.89393490  | -7.63008997 | 9.78054662  |
| C | 1.60004278  | -5.15805082 | -0.52895809  | O | -4.49107550  | -4.80129275 | 6.60331764  |
| C | 1.38431397  | -6.47623601 | -0.84092479  | N | 2.16593438   | -3.53596233 | 3.93233655  |
| H | 1.36359750  | -7.20397046 | -0.26230075  | N | 2.15878765   | -4.79800440 | 4.29401304  |
| C | 0.93786433  | -7.61276024 | -3.06654629  | N | 2.29887869   | -4.83313059 | 5.62870369  |
| H | 1.19042722  | -8.43505488 | -2.61829656  | N | -3.72524999  | -6.17652856 | 8.23892444  |
| H | 1.47545337  | -7.53030544 | -3.86972805  | C | 2.36775481   | -1.27398563 | 4.93231177  |
| C | -0.54308239 | -7.67957505 | -3.45181335  | H | 1.65255838   | -1.03098901 | 4.32374741  |

|   |             |              |             |   |             |            |             |
|---|-------------|--------------|-------------|---|-------------|------------|-------------|
| H | 2.14864976  | -0.93376041  | 5.81389687  | O | -4.55816419 | 6.66544738 | 7.85349295  |
| C | 2.32466467  | -2.76234117  | 5.04385710  | O | -1.60231339 | 5.18456596 | 10.97081105 |
| C | 2.40656252  | -3.58342215  | 6.13957291  | N | 2.86223981  | 3.14448374 | 5.23309277  |
| H | 2.51185687  | -3.33806931  | 7.03038570  | N | 3.05840968  | 3.45881397 | 6.49258673  |
| C | 2.31662762  | -6.11248256  | 6.33997460  | N | 2.89931656  | 4.78721282 | 6.60351153  |
| H | 2.71491215  | -5.98773778  | 7.21558437  | N | -3.09579946 | 5.85853665 | 9.39974939  |
| H | 2.86265314  | -6.74572311  | 5.84827934  | C | 2.31959008  | 4.22655021 | 3.06701708  |
| C | 0.90316097  | -6.67986890  | 6.50209456  | H | 1.75053406  | 3.46746806 | 2.86484532  |
| H | 0.96139188  | -7.54140704  | 6.94406485  | H | 1.86421790  | 5.03481965 | 2.78366355  |
| H | 0.52163990  | -6.82363115  | 5.62210730  | C | 2.58883346  | 4.28313363 | 4.53460272  |
| C | -0.03600304 | -5.77626502  | 7.30513081  | C | 2.60523535  | 5.34373145 | 5.40427943  |
| H | -0.10960752 | -4.91410597  | 6.86676019  | H | 2.44970409  | 6.24063994 | 5.21402289  |
| H | 0.33023336  | -5.63475703  | 8.19214637  | C | 3.04445582  | 5.44647000 | 7.90246395  |
| C | -1.42253845 | -6.41040654  | 7.42021820  | H | 3.19727300  | 6.39460956 | 7.76621941  |
| H | -1.34711852 | -7.25222296  | 7.89619203  | H | 3.81517203  | 5.08053932 | 8.36397556  |
| H | -1.75891179 | -6.59990920  | 6.53033915  | C | 1.79574247  | 5.25345493 | 8.76823427  |
| C | -2.41339009 | -5.51948779  | 8.14450068  | H | 1.94567111  | 5.67242118 | 9.63018856  |
| H | -2.08332270 | -5.32542277  | 9.03574710  | H | 1.66408391  | 4.30450179 | 8.91909010  |
| H | -2.50465492 | -4.68069715  | 7.66611157  | C | 0.52148505  | 5.83622654 | 8.15175916  |
| C | -3.85119581 | -7.25801843  | 9.11468576  | H | 0.35603278  | 5.41713397 | 7.29275299  |
| C | -5.17643415 | -7.90974180  | 9.18689347  | H | 0.63758151  | 6.78832393 | 8.00690626  |
| C | -6.21269544 | -7.50553491  | 8.30068237  | C | -0.67609836 | 5.60204706 | 9.07307072  |
| C | -6.01035943 | -6.44545296  | 7.39208056  | H | -0.52195276 | 6.05865644 | 9.91487898  |
| C | -4.72625043 | -5.72705004  | 7.35179565  | H | -0.75243179 | 4.65289879 | 9.25809445  |
| C | -5.40149365 | -8.91246958  | 10.10244387 | C | -1.97881175 | 6.09574460 | 8.47364696  |
| H | -4.71869333 | -9.17531462  | 10.67620882 | H | -1.90979131 | 7.04485530 | 8.28562846  |
| C | -7.46073443 | -8.16622353  | 8.34213177  | H | -2.14675548 | 5.63295401 | 7.63795868  |
| C | -7.66894348 | -9.18687129  | 9.30726882  | C | -4.38186924 | 6.19581005 | 8.96996828  |
| H | -8.49145450 | -9.61833600  | 9.35422148  | C | -5.48901104 | 5.95769768 | 9.92062780  |
| C | -6.65600043 | -9.54220048  | 10.17697268 | C | -5.20364262 | 5.52185935 | 11.24395716 |
| H | -6.80485459 | -10.20179420 | 10.81535880 | C | -3.87740752 | 5.25425795 | 11.64365804 |
| C | -7.02207737 | -6.07830186  | 6.50873845  | C | -2.76265554 | 5.40813461 | 10.69481055 |
| H | -6.88777282 | -5.37349729  | 5.91693330  | C | -6.79112510 | 6.16849447 | 9.52767619  |
| C | -8.47826945 | -7.76855762  | 7.41255475  | H | -6.97104631 | 6.45764015 | 8.66249807  |
| H | -9.30546812 | -8.19374319  | 7.42329225  | C | -6.26300194 | 5.34379839 | 12.16149787 |
| C | -8.23980085 | -6.76668776  | 6.50912873  | C | -7.59732607 | 5.55433765 | 11.72353132 |
| H | -8.89527523 | -6.54163905  | 5.88878543  | H | -8.30392042 | 5.42535206 | 12.31427479 |
| O | 3.57405547  | 4.09943361   | 2.36835213  | C | -7.85131765 | 5.94970970 | 10.42435216 |

|   |             |             |              |   |                     |             |              |
|---|-------------|-------------|--------------|---|---------------------|-------------|--------------|
| H | -8.72867129 | 6.07187253  | 10.14135901  | C | -3.31261718         | 10.66256783 | -9.07586026  |
| C | -3.60712985 | 4.85693000  | 12.95046594  | C | -2.30630260         | 9.75287411  | -8.50450238  |
| H | -2.73242499 | 4.67343174  | 13.20783788  | C | -1.46766352         | 12.09888846 | -11.96308849 |
| C | -5.94868545 | 4.94170188  | 13.50207710  | H | -0.62580753         | 12.05308511 | -12.35512238 |
| H | -6.63276211 | 4.82181776  | 14.12080373  | C | -4.00144196         | 12.28914933 | -10.76316267 |
| C | -4.64767922 | 4.73305071  | 13.87709246  | C | -3.70558806         | 13.01560048 | -11.94692850 |
| H | -4.45406582 | 4.50639663  | 14.75814931  | H | -4.35272308         | 13.56533936 | -12.32626236 |
| O | 3.12646951  | 3.32813001  | -2.89837043  | C | -2.46139827         | 12.90989141 | -12.53812610 |
| O | 0.47222239  | 10.50446538 | -10.64755672 | H | -2.28018445         | 13.37795313 | -13.32096585 |
| O | -2.50169731 | 9.04922270  | -7.53535394  | C | -4.56191803         | 10.76078478 | -8.46901003  |
| N | 1.90433092  | 6.22139143  | -2.87538303  | H | -4.75770938         | 10.23984881 | -7.72381743  |
| N | 2.21921416  | 7.47439817  | -3.10869357  | C | -5.27491675         | 12.37286407 | -10.10827112 |
| N | 2.94614509  | 7.50146055  | -4.23700979  | H | -5.93651347         | 12.92783298 | -10.45389376 |
| N | -1.04468862 | 9.73302153  | -9.13614021  | C | -5.52315466         | 11.64083032 | -8.97721251  |
| C | 2.24635386  | 3.96378280  | -3.84669353  | H | -6.34039635         | 11.73009214 | -8.54216340  |
| H | 1.32276212  | 3.77494776  | -3.61816889  |   |                     |             |              |
| H | 2.41774610  | 3.62069969  | -4.73768803  |   | <b>compound 1-2</b> |             |              |
| C | 2.44577510  | 5.44353014  | -3.85565492  | C | 1.20547200          | -5.21117300 | 5.12329900   |
| C | 3.11307187  | 6.25432523  | -4.73815176  | C | -2.52172700         | -1.23409900 | 2.61518900   |
| H | 3.57481558  | 6.00475262  | -5.50583570  | C | 3.16509900          | -3.03822700 | -1.96139000  |
| C | 3.44201440  | 8.77129709  | -4.77048109  | C | -1.60528000         | -2.46231800 | -1.38931200  |
| H | 4.17139865  | 8.59820835  | -5.38604848  | C | 0.06319200          | -3.03967100 | 6.41945600   |
| H | 3.78446930  | 9.31351219  | -4.04272487  | C | 0.37907500          | -1.25965100 | -2.09096600  |
| C | 2.33545335  | 9.54008170  | -5.49889783  | C | -3.08519000         | -2.02378900 | 1.61366400   |
| H | 2.69373347  | 10.38811666 | -5.80459142  | C | -0.00787700         | -0.19215400 | -1.27666300  |
| H | 1.62133586  | 9.72950003  | -4.87059821  | C | 3.54882500          | -0.79229500 | -1.19404400  |
| C | 1.75067245  | 8.79064614  | -6.69880362  | C | 4.20305000          | -4.19094600 | 4.51341400   |
| H | 1.38032454  | 7.94427106  | -6.40317498  | C | -0.76345600         | -3.90326700 | 5.70853700   |
| H | 2.45470065  | 8.60575178  | -7.33998111  | C | 2.84096200          | -1.67463900 | -2.01495000  |
| C | 0.65526164  | 9.62109853  | -7.36834450  | C | 4.58190700          | -1.26257000 | -0.38086800  |
| H | 1.04151602  | 10.44744293 | -7.69827875  | C | 5.34774900          | -3.45564500 | 2.01600600   |
| H | -0.01757818 | 9.84909509  | -6.70785442  | C | 4.66673600          | -2.90030600 | 4.27085600   |
| C | -0.00897553 | 8.89099201  | -8.51979652  | C | -0.41835200         | -2.41396100 | -2.12429300  |
| H | 0.65832261  | 8.65941374  | -9.18463529  | C | -0.17114800         | -5.00230800 | 5.05723200   |
| H | -0.40995270 | 8.06992644  | -8.19449083  | C | 4.92083600          | -4.76925200 | 2.25953300   |
| C | -0.67670424 | 10.52617072 | -10.22606794 | C | -2.27256600         | -1.73253900 | 3.89325700   |
| C | -1.73151101 | 11.37204170 | -10.82448163 | C | 5.18270000          | -2.50885400 | 3.03127600   |
| C | -3.01413912 | 11.44093768 | -10.21398243 | C | 3.54639300          | -4.54686700 | 5.83832800   |



|   |             |             |             |   |              |             |             |
|---|-------------|-------------|-------------|---|--------------|-------------|-------------|
| H | 3.75323500  | -5.59551800 | 6.07539100  | C | -0.711171400 | -4.64607600 | -2.93803000 |
| H | 3.98122800  | -3.93312700 | 6.63160800  | H | -0.16766700  | -5.33309600 | -3.59118200 |
| C | -3.17082900 | -3.85568900 | 3.21561000  | H | -0.80055000  | -5.09049600 | -1.93617900 |
| C | -1.99363800 | -1.39411700 | -0.57698600 | H | -1.72121600  | -4.48820400 | -3.34422000 |
| C | -2.25094900 | -3.63580300 | 5.57530900  | C | -4.44193600  | -5.40315900 | 1.21909100  |
| H | -2.81472100 | -4.56325400 | 5.72287100  | H | -4.87603300  | -5.78660400 | 0.29325300  |
| H | -2.55034600 | -2.94065700 | 6.36613000  | H | -3.63209200  | -6.07075100 | 1.54615500  |
| C | 4.16488800  | -3.50994700 | -1.10867800 | H | -5.22538700  | -5.36551000 | 1.98482300  |
| C | 1.44593500  | -3.23554900 | 6.47167900  | C | -0.48184000  | -6.81214500 | 3.52565500  |
| C | -3.28440800 | -1.46462000 | 0.21586900  | H | -1.32542600  | -7.26997200 | 3.00212600  |
| H | -3.99283700 | -2.08792400 | -0.33050900 | H | 0.20606100   | -6.37012000 | 2.79128000  |
| H | -3.71503300 | -0.46130800 | 0.29265600  | H | 0.05398500   | -7.58892700 | 4.09029400  |
| C | 1.68167200  | -1.19118500 | -2.86645100 | C | 3.90555200   | -7.35738700 | 2.69762500  |
| H | 1.61081800  | -1.80379400 | -3.76947900 | H | 3.44918100   | -8.26302700 | 3.10410700  |
| H | 1.85459500  | -0.15716000 | -3.17768000 | H | 3.33845400   | -7.02648500 | 1.81561800  |
| C | 4.33024600  | -5.13069800 | 3.47118500  | H | 4.93756000   | -7.57998300 | 2.39183000  |
| C | -2.59384600 | -3.05732200 | 4.21287700  | H | 5.12883700   | -0.55913500 | 0.23274400  |
| C | -1.16229700 | -0.26508200 | -0.49574800 | H | 0.62624600   | 0.68566000  | -1.25588600 |
| C | 5.95421200  | -3.08857200 | 0.67416900  | H | -2.25161200  | -0.21066900 | 2.39300700  |
| H | 6.48086800  | -3.95922900 | 0.27441000  | H | -0.34459700  | -2.17124600 | 6.92339500  |
| H | 6.68817600  | -2.29010500 | 0.81670800  | H | 4.63297400   | -2.16650700 | 5.06736000  |
| C | -3.40942400 | -3.35577500 | 1.93197600  | O | 3.16966700   | 0.54066100  | -1.10630600 |
| C | 2.04040900  | -4.32428600 | 5.82186100  | O | 9.62525500   | -6.23495300 | -2.30517400 |
| C | 4.90403600  | -2.61437300 | -0.31169400 | O | 5.66005800   | -4.97216000 | -4.18708100 |
| H | -2.24546100 | -3.33745900 | -1.41023900 | N | 5.96252300   | 1.68101000  | -0.52023000 |
| H | -3.39274700 | -4.88773000 | 3.45688200  | N | 7.23614400   | 1.40584400  | -0.58554400 |
| H | 1.66832900  | -6.05080300 | 4.62077300  | N | 7.48958000   | 0.94308100  | -1.83149200 |
| H | 5.03020500  | -5.48717000 | 1.45623800  | N | 7.59169600   | -5.65222500 | -3.17307100 |
| H | 2.58814600  | -3.71841000 | -2.57489700 | C | 3.89314200   | 1.48037100  | -1.91945300 |
| O | 0.04019900  | -3.44947800 | -2.91487300 | H | 3.51151500   | 2.45643100  | -1.61536800 |
| O | -3.95362100 | -4.10726100 | 0.91127800  | H | 3.66342800   | 1.31903100  | -2.98290300 |
| O | -1.03579200 | -5.82782700 | 4.37576400  | C | 5.37264400   | 1.39889100  | -1.71950000 |
| O | 3.86040400  | -6.39798100 | 3.73645900  | C | 6.35102600   | 0.92353700  | -2.56751300 |
| O | 4.49860700  | -4.83932900 | -0.98539500 | H | 6.31414300   | 0.56617400  | -3.58442500 |
| C | 3.72180900  | -5.78902800 | -1.69982900 | C | 8.84192100   | 0.53012900  | -2.20254200 |
| H | 4.12802700  | -6.76733200 | -1.43001200 | H | 9.38589600   | 0.43805500  | -1.25892600 |
| H | 2.66413700  | -5.73941300 | -1.40618500 | H | 9.30828600   | 1.33246700  | -2.78642600 |
| H | 3.81315900  | -5.64496200 | -2.78204400 | C | 8.86072400   | -0.78694400 | -2.98522100 |

|   |             |              |             |   |              |             |             |
|---|-------------|--------------|-------------|---|--------------|-------------|-------------|
| H | 9.90932500  | -1.00727100  | -3.22462300 | H | -0.77313800  | 1.78843300  | 1.88055000  |
| H | 8.35599800  | -0.64641100  | -3.95102600 | C | -1.34298200  | 3.07045500  | 0.27167100  |
| C | 8.23320700  | -1.97317900  | -2.24355600 | C | -2.43917200  | 3.74698800  | 0.77146700  |
| H | 7.19619200  | -1.73982300  | -1.97023000 | H | -3.04887500  | 3.57944900  | 1.64877300  |
| H | 8.77106200  | -2.13980700  | -1.29953700 | C | -3.74509300  | 5.70314100  | -0.16100800 |
| C | 8.25823500  | -3.25123500  | -3.08983300 | H | -3.59528900  | 6.26361200  | -1.08764700 |
| H | 9.29252900  | -3.52296100  | -3.33698600 | H | -3.60889300  | 6.38467800  | 0.68386100  |
| H | 7.72508700  | -3.07966300  | -4.03358800 | C | -5.13038700  | 5.04238100  | -0.14726900 |
| C | 7.59331600  | -4.42074100  | -2.36282600 | H | -5.87591600  | 5.83095900  | -0.31763200 |
| H | 8.12426200  | -4.64981400  | -1.43804800 | H | -5.33401000  | 4.63576200  | 0.85278400  |
| H | 6.55540400  | -4.19118400  | -2.13179900 | C | -5.28464400  | 3.92441800  | -1.18736500 |
| C | 8.69115100  | -6.51690500  | -3.04437100 | H | -4.64008400  | 3.08504000  | -0.89468800 |
| C | 8.64838400  | -7.77342400  | -3.83386200 | H | -4.91116600  | 4.26321500  | -2.16334200 |
| C | 7.56211500  | -8.03320700  | -4.70661800 | C | -6.73448100  | 3.43686400  | -1.32204600 |
| C | 6.50887800  | -7.09436300  | -4.84355100 | H | -7.32237000  | 4.15446700  | -1.90913600 |
| C | 6.52981200  | -5.82888700  | -4.06887000 | H | -7.20327500  | 3.36543800  | -0.33554800 |
| C | 9.67775500  | -8.69031900  | -3.71216100 | C | -6.78411800  | 2.06007200  | -1.99173100 |
| H | 10.49723800 | -8.46330500  | -3.03818100 | H | -6.26275800  | 2.07838300  | -2.94829300 |
| C | 7.53196200  | -9.24650900  | -5.45935800 | H | -6.30548300  | 1.31565300  | -1.34831700 |
| C | 8.60307500  | -10.16599700 | -5.30585500 | C | -8.53420200  | 1.42407900  | -3.61643000 |
| H | 8.58512300  | -11.09207300 | -5.87519900 | C | -9.84962000  | 0.77944200  | -3.86875000 |
| C | 9.65221200  | -9.89242800  | -4.45102200 | C | -10.64762700 | 0.32526000  | -2.79048100 |
| H | 10.46584800 | -10.60348100 | -4.34315400 | C | -10.20687200 | 0.49611600  | -1.45619200 |
| C | 5.45651500  | -7.34931900  | -5.70547500 | C | -8.90742100  | 1.15497600  | -1.18141300 |
| H | 4.66872600  | -6.60852700  | -5.79552900 | C | -10.27605700 | 0.59677900  | -5.17241900 |
| C | 6.43338700  | -9.47734800  | -6.32882100 | H | -9.64204400  | 0.94851000  | -5.97950500 |
| H | 6.40418200  | -10.39993600 | -6.90335800 | C | -11.88901900 | -0.32991900 | -3.04998900 |
| C | 5.41878900  | -8.54838600  | -6.44848300 | C | -12.29810900 | -0.49502300 | -4.39936300 |
| H | 4.58546900  | -8.73606100  | -7.11906700 | H | -13.24276300 | -0.99288400 | -4.60368300 |
| O | -1.59083600 | 0.71003400   | 0.36964700  | C | -11.50812900 | -0.04090600 | -5.43681000 |
| O | -7.81869900 | 1.81297700   | -4.52889900 | H | -11.83044100 | -0.17422200 | -6.46541900 |
| O | -8.49932900 | 1.33216000   | -0.03677900 | C | -10.97421300 | 0.02630300  | -0.40585800 |
| N | -0.96225700 | 3.67033000   | -0.89245800 | H | -10.61484700 | 0.16947800  | 0.60756500  |
| N | -1.76652800 | 4.67270600   | -1.13811200 | C | -12.64755300 | -0.80630800 | -1.94866900 |
| N | -2.66886600 | 4.72334400   | -0.13273200 | H | -13.58822100 | -1.31636900 | -2.14038200 |
| N | -8.14805200 | 1.57234800   | -2.27336700 | C | -12.19703800 | -0.63378700 | -0.65567100 |
| C | -0.75240200 | 1.80107000   | 0.78583400  | H | -12.78321200 | -1.00603100 | 0.17925400  |
| H | 0.28144500  | 1.68143500   | 0.45487500  | O | -1.64435300  | -0.91689200 | 4.82106200  |

|   |              |             |             |   |              |             |             |
|---|--------------|-------------|-------------|---|--------------|-------------|-------------|
| O | -7.92589500  | -1.44291500 | -2.18640200 | H | -11.22358800 | -3.34343000 | -5.23810800 |
| O | -7.62672400  | -4.60094400 | 1.10790000  | C | -9.58927100  | -6.24447800 | -0.09512200 |
| N | -2.94425800  | 1.83105000  | 4.02788500  | H | -9.14644200  | -6.56755800 | 0.84130700  |
| N | -3.94561000  | 2.32873600  | 3.34953000  | C | -11.12707900 | -6.59426100 | -1.93447600 |
| N | -5.05095300  | 1.61920400  | 3.66660800  | H | -11.88488700 | -7.19350200 | -2.43336700 |
| N | -7.74477400  | -3.04237400 | -0.55861400 | C | -10.57466800 | -7.01945600 | -0.74222000 |
| C | -2.50538200  | -0.08397100 | 5.61627200  | H | -10.89664700 | -7.95598300 | -0.29662100 |
| H | -1.83042800  | 0.50245800  | 6.23972200  | O | 2.23039600   | -2.34341000 | 7.19267100  |
| H | -3.13285300  | -0.70545500 | 6.27172700  | O | 3.40146900   | 6.86356600  | 1.82986900  |
| C | -3.39417600  | 0.79438500  | 4.79580600  | O | -1.15137300  | 6.70324400  | 1.46375400  |
| C | -4.74627400  | 0.65561800  | 4.56628400  | N | 0.52988700   | 0.03004700  | 7.40661100  |
| H | -5.46991500  | -0.04887100 | 4.94333700  | N | -0.01021400  | 1.22272800  | 7.33252300  |
| C | -6.34661400  | 1.93646100  | 3.06715100  | N | 0.79233500   | 1.98624500  | 6.55734800  |
| H | -6.12792000  | 2.50789300  | 2.16058100  | N | 1.12521200   | 6.79244200  | 1.65188500  |
| H | -6.90026900  | 2.58834200  | 3.75345400  | C | 2.59060500   | -1.16148200 | 6.48378900  |
| C | -7.16130300  | 0.68612200  | 2.72821100  | H | 2.64128400   | -1.38310700 | 5.41108300  |
| H | -8.10366500  | 1.03340700  | 2.29405500  | H | 3.60405100   | -0.90002500 | 6.81467000  |
| H | -7.41690400  | 0.14267400  | 3.64839400  | C | 1.68273600   | 0.02257000  | 6.68627000  |
| C | -6.46723000  | -0.24779500 | 1.73052000  | C | 1.86935600   | 1.27899400  | 6.14015500  |
| H | -5.55338700  | -0.67209900 | 2.16460600  | H | 2.66333800   | 1.68293300  | 5.52446000  |
| H | -6.15867700  | 0.34755500  | 0.86171500  | C | 0.44264600   | 3.38079000  | 6.30206300  |
| C | -7.39789600  | -1.36676500 | 1.25229400  | H | 1.26549600   | 4.00842700  | 6.66573100  |
| H | -8.31000000  | -0.91410000 | 0.85064000  | H | -0.43242800  | 3.56922500  | 6.92873400  |
| H | -7.68620000  | -2.01768200 | 2.08668300  | C | 0.13339400   | 3.71215500  | 4.83521300  |
| C | -6.75040200  | -2.21537700 | 0.15370500  | H | -0.27959300  | 4.72891700  | 4.85226800  |
| H | -6.29186300  | -1.57431600 | -0.59817700 | H | -0.67257600  | 3.06211900  | 4.47337900  |
| H | -5.99218700  | -2.88471000 | 0.55868000  | C | 1.35119800   | 3.65566500  | 3.89153100  |
| C | -8.28266300  | -2.53261100 | -1.74795700 | H | 1.56639100   | 2.61393800  | 3.62940300  |
| C | -9.29483100  | -3.36598400 | -2.44041500 | H | 2.24970800   | 4.01849500  | 4.41166100  |
| C | -9.72179600  | -4.59162000 | -1.86962600 | C | 1.18067600   | 4.46804500  | 2.59586700  |
| C | -9.16667100  | -5.04793500 | -0.64812400 | H | 0.28963000   | 4.14667400  | 2.04588100  |
| C | -8.13012200  | -4.24582600 | 0.04824300  | H | 2.04563700   | 4.29826300  | 1.94414400  |
| C | -9.82950400  | -2.93450400 | -3.64146200 | C | 1.06867700   | 5.97187700  | 2.87649100  |
| H | -9.48633200  | -1.99631200 | -4.06170700 | H | 0.12442300   | 6.21338200  | 3.36338200  |
| C | -10.71697600 | -5.37332900 | -2.53129500 | H | 1.89575500   | 6.29691100  | 3.51028800  |
| C | -11.24921200 | -4.89491200 | -3.75841500 | C | 2.39385200   | 7.20476100  | 1.22015000  |
| H | -12.00727600 | -5.48595500 | -4.26674800 | C | 2.44673400   | 8.08649000  | 0.02924200  |
| C | -10.81095400 | -3.70439900 | -4.30132900 | C | 1.25149900   | 8.46824600  | -0.62849500 |

|   |             |             |             |                            |             |             |             |
|---|-------------|-------------|-------------|----------------------------|-------------|-------------|-------------|
| C | -0.00371700 | 7.99824900  | -0.16919200 | H                          | 4.91567900  | 5.92712600  | 0.32194800  |
| C | -0.08406500 | 7.11553700  | 1.02153200  | C                          | 5.85640600  | 5.14949200  | -1.45306000 |
| C | 3.66853500  | 8.55863700  | -0.42017100 | H                          | 6.79957600  | 5.27827200  | -1.98361000 |
| H | 4.56826700  | 8.25885300  | 0.10395000  | H                          | 5.61394000  | 4.08792100  | -1.41259400 |
| C | 1.31351900  | 9.33680600  | -1.76034400 | C                          | 5.18537000  | 6.75776700  | -3.21531900 |
| C | 2.58372700  | 9.79104900  | -2.19994300 | C                          | 4.10500000  | 7.29984700  | -4.07810400 |
| H | 2.63848400  | 10.42653200 | -3.07959500 | C                          | 2.76153500  | 6.89362800  | -3.88322200 |
| C | 3.73591100  | 9.40980700  | -1.54273800 | C                          | 2.42848700  | 5.96810600  | -2.86357600 |
| H | 4.70474500  | 9.74483700  | -1.89961200 | C                          | 3.48789400  | 5.40404400  | -2.00301700 |
| C | -1.16544000 | 8.38723500  | -0.81238200 | C                          | 4.41714700  | 8.22928900  | -5.05525900 |
| H | -2.11352200 | 8.02544600  | -0.43398100 | H                          | 5.45362500  | 8.52683200  | -5.17614400 |
| C | 0.10156600  | 9.70479900  | -2.39936500 | C                          | 1.72787800  | 7.44294100  | -4.70002500 |
| H | 0.14609600  | 10.35718000 | -3.26775500 | C                          | 2.08441000  | 8.39308300  | -5.69140100 |
| C | -1.11193600 | 9.24268900  | -1.93144500 | H                          | 1.30164800  | 8.81724200  | -6.31624500 |
| H | -2.03335300 | 9.53277200  | -2.42795700 | C                          | 3.40071500  | 8.77820100  | -5.86463000 |
| O | 5.56982400  | -1.19240500 | 2.82878900  | H                          | 3.65882200  | 9.50604400  | -6.62857900 |
| O | 6.35077000  | 7.12565300  | -3.31349200 | C                          | 1.11224400  | 5.59182600  | -2.65753800 |
| O | 3.25052800  | 4.61952900  | -1.08844700 | H                          | 0.87016100  | 4.87628300  | -1.87843200 |
| N | 4.48176900  | 1.88435800  | 4.25294400  | C                          | 0.38791800  | 7.03281200  | -4.46412700 |
| N | 5.13364100  | 3.01240400  | 4.36891000  | H                          | -0.40302500 | 7.45471200  | -5.07981800 |
| N | 6.15606500  | 2.97129000  | 3.48961500  | C                          | 0.08728200  | 6.12945000  | -3.46537000 |
| N | 4.81030600  | 5.78757900  | -2.27581400 | H                          | -0.93510200 | 5.83139500  | -3.26177300 |
| C | 4.50654500  | -0.22264300 | 2.93012200  | H                          | 8.03111300  | 3.74621300  | 3.07164700  |
| H | 3.78430000  | -0.50851200 | 3.70077500  |                            |             |             |             |
| H | 3.96871100  | -0.18275200 | 1.97452500  |                            |             |             |             |
| C | 5.06695200  | 1.11360400  | 3.29100200  | complex 1·Cu <sup>2+</sup> |             |             |             |
| C | 6.14902300  | 1.80855700  | 2.78940000  | C                          | 1.53095400  | 3.32122400  | 3.02952500  |
| H | 6.86582300  | 1.58208100  | 2.01627400  | C                          | -3.28679100 | 1.88699100  | -1.36716200 |
| C | 7.04960300  | 4.12452100  | 3.37628100  | C                          | -2.83222900 | -2.85302900 | 3.55051100  |
| H | 7.13775700  | 4.53880600  | 4.38376700  | C                          | -5.70284800 | -1.57363200 | 0.43199000  |
| C | 6.53617000  | 5.18179200  | 2.39056300  | C                          | -0.42812800 | 2.01523000  | 1.56891700  |
| H | 7.16785400  | 6.07448400  | 2.50008100  | C                          | -4.12558200 | -3.34131400 | 0.98077500  |
| H | 5.51943100  | 5.47452100  | 2.67900700  | C                          | -4.39006500 | 1.36189300  | -0.69809600 |
| C | 6.54740600  | 4.69755900  | 0.93848900  | C                          | -3.29852500 | -2.86173400 | -0.03226200 |
| H | 5.97511300  | 3.76735000  | 0.86094500  | C                          | -1.81159500 | -5.02774200 | 3.46598500  |
| H | 7.57615100  | 4.44990400  | 0.63427100  | C                          | 2.28280200  | 0.11461400  | 4.35254100  |
| C | 5.92640900  | 5.71067900  | -0.02732100 | C                          | -0.56537900 | 3.37972500  | 1.78503400  |
| H | 6.48576800  | 6.65654700  | -0.02593600 | C                          | -2.76765400 | -4.11528300 | 2.96748300  |
|   |             |             |             | C                          | -0.94458900 | -4.66175300 | 4.49899400  |

|   |             |             |             |   |             |             |             |
|---|-------------|-------------|-------------|---|-------------|-------------|-------------|
| C | 0.85487900  | -1.93478800 | 5.69104900  | O | -5.79775200 | 1.33097900  | 1.18380700  |
| C | 2.55969500  | -1.21499200 | 4.08995100  | O | 0.28859400  | 5.38505000  | 2.64814600  |
| C | -5.34146000 | -2.67218000 | 1.21993000  | O | 1.26406700  | 1.72901600  | 5.71944200  |
| C | 0.45280500  | 4.04404400  | 2.51003700  | O | -2.04046000 | -1.28255700 | 5.22547600  |
| C | 0.66293100  | -0.60493300 | 6.04019500  | C | -2.83307700 | -0.24954900 | 4.65052500  |
| C | -2.48162000 | 2.86865200  | -0.78124700 | H | -2.66985700 | 0.63098300  | 5.27488300  |
| C | 1.87286100  | -2.25162500 | 4.74425600  | H | -2.51687200 | -0.03007500 | 3.62195800  |
| C | 2.81640400  | 1.20307800  | 3.45491800  | H | -3.89965100 | -0.50608800 | 4.65829200  |
| H | 3.43269800  | 1.91632500  | 4.00893500  | C | -7.32117800 | -2.52327100 | 2.56355200  |
| H | 3.45665800  | 0.76657600  | 2.68817400  | H | -7.72544800 | -3.06672500 | 3.41913500  |
| C | -3.86296900 | 2.81416000  | 1.18694800  | H | -7.18650800 | -1.46584400 | 2.83332300  |
| C | -4.85612800 | -1.08421100 | -0.57194700 | H | -8.01317900 | -2.60662500 | 1.72124400  |
| C | -1.73850500 | 4.18313000  | 1.23911700  | C | -6.07729800 | 1.67012000  | 2.53602000  |
| H | -2.21746100 | 4.72074000  | 2.06632800  | H | -6.97098600 | 1.10181700  | 2.80278800  |
| H | -1.33445500 | 4.95816900  | 0.57775800  | H | -5.24930800 | 1.37152600  | 3.19505400  |
| C | -1.98587700 | -2.49278200 | 4.60544700  | H | -6.28189700 | 2.73955900  | 2.64218400  |
| C | 0.69040900  | 1.29549500  | 2.02394100  | C | 1.29612400  | 6.13547300  | 3.32006400  |
| C | -5.19354900 | 0.21508700  | -1.28606100 | H | 0.96940700  | 7.17524800  | 3.27935600  |
| H | -6.26564700 | 0.41077600  | -1.18686600 | H | 1.39378200  | 5.82371800  | 4.36776300  |
| H | -4.98206600 | 0.14032800  | -2.35615200 | H | 2.26788300  | 6.03336600  | 2.81962600  |
| C | -3.68614100 | -4.51357400 | 1.82738800  | C | 0.32094500  | 2.13893800  | 6.70857800  |
| H | -4.56265100 | -5.02625000 | 2.24019900  | H | 0.40728500  | 3.22430600  | 6.76399600  |
| H | -3.15527100 | -5.23637300 | 1.20439500  | H | -0.69912300 | 1.86466600  | 6.41297500  |
| C | 1.37876600  | 0.42322000  | 5.40982500  | H | 0.55379000  | 1.69906500  | 7.68508800  |
| C | -2.74209600 | 3.32026400  | 0.51599800  | H | -0.21126700 | -5.36934600 | 4.86915500  |
| C | -3.64276200 | -1.74861000 | -0.80062500 | H | -2.35316700 | -3.36069800 | -0.21140700 |
| C | -0.06939700 | -3.01043400 | 6.21225600  | H | -3.02139100 | 1.50755700  | -2.34594900 |
| H | -0.62582900 | -2.62907900 | 7.07415600  | H | -1.19568700 | 1.51065600  | 0.99906700  |
| H | 0.49574200  | -3.88809500 | 6.53779600  | H | 3.26223800  | -1.44141100 | 3.30353700  |
| C | -4.68994400 | 1.86115600  | 0.58787800  | O | -1.83572500 | -6.29198800 | 2.93325000  |
| C | 1.67061900  | 1.95228400  | 2.80672000  | O | 7.36402600  | -3.28325100 | 1.68908100  |
| C | -1.01969100 | -3.40676600 | 5.09622700  | O | 8.46698500  | -6.31470500 | -1.54900100 |
| H | -6.62975500 | -1.04719700 | 0.61824600  | N | -0.55005200 | -5.31539100 | 0.70492000  |
| H | -4.07434900 | 3.17226700  | 2.18780400  | N | 0.23111500  | -4.99292200 | -0.29417700 |
| H | 2.29798700  | 3.81843400  | 3.60930000  | N | 1.31860000  | -5.78202500 | -0.27301200 |
| H | -0.08843900 | -0.37484000 | 6.78377000  | N | 7.92222200  | -4.79817700 | 0.06821600  |
| H | -3.55642700 | -2.14702200 | 3.16591300  | C | -0.61136600 | -6.93570300 | 2.61107800  |
| O | -6.07615700 | -3.14136200 | 2.26795300  | H | -0.88569800 | -7.97613700 | 2.41312400  |

|   |             |             |             |   |              |             |             |
|---|-------------|-------------|-------------|---|--------------|-------------|-------------|
| H | 0.08740800  | -6.93951100 | 3.45782700  | O | -8.03633100  | -4.26704800 | -0.13430000 |
| C | 0.03728700  | -6.31687300 | 1.39879300  | O | -6.06501300  | -2.53821200 | -3.87914600 |
| C | 1.23700300  | -6.62721800 | 0.78106100  | N | -1.63415800  | -3.86673200 | -2.73843400 |
| H | 1.99166400  | -7.36563200 | 0.99476000  | N | -1.78809200  | -5.12162700 | -3.10474100 |
| C | 2.33958800  | -5.63214800 | -1.32310000 | N | -2.83947600  | -5.15533400 | -3.93296400 |
| H | 2.76432200  | -4.63115200 | -1.21029800 | N | -7.08951100  | -3.44220000 | -2.03715200 |
| H | 1.79729300  | -5.65906300 | -2.27310200 | C | -2.80750200  | -1.62344800 | -3.07015100 |
| C | 3.41628100  | -6.71939400 | -1.28155200 | H | -2.03613700  | -1.03500600 | -3.57191500 |
| H | 3.90373400  | -6.72238500 | -2.26352600 | H | -3.78645600  | -1.35427000 | -3.48431600 |
| H | 2.92427300  | -7.69614300 | -1.19731500 | C | -2.60307400  | -3.09086500 | -3.31099500 |
| C | 4.49790400  | -6.55989500 | -0.19139500 | C | -3.37232500  | -3.92046500 | -4.09488700 |
| H | 4.93975000  | -7.54726800 | -0.00635100 | H | -4.25852500  | -3.71586000 | -4.67183800 |
| H | 4.04788200  | -6.23767200 | 0.75801100  | C | -3.35059300  | -6.42611400 | -4.46312700 |
| C | 5.62709500  | -5.58998900 | -0.57305500 | H | -2.76626300  | -7.21065500 | -3.97698200 |
| H | 5.25255100  | -4.56127900 | -0.62501400 | H | -3.14207400  | -6.45454300 | -5.53764800 |
| H | 6.01480400  | -5.85210300 | -1.56236900 | C | -4.85344100  | -6.57363500 | -4.19142900 |
| C | 6.78467400  | -5.66229700 | 0.43286700  | H | -5.20496100  | -7.43974300 | -4.76343200 |
| H | 6.46097900  | -5.36057700 | 1.42894900  | H | -5.37032300  | -5.70831100 | -4.62454600 |
| H | 7.16181600  | -6.68702100 | 0.47663700  | C | -5.23749100  | -6.72839800 | -2.69794700 |
| C | 8.14006300  | -3.62133500 | 0.79008100  | H | -4.39067000  | -6.44060900 | -2.05803500 |
| C | 9.31399500  | -2.80514600 | 0.41179300  | H | -5.42642600  | -7.78561400 | -2.48374100 |
| C | 10.15124800 | -3.21517600 | -0.65851500 | C | -6.46716700  | -5.88143200 | -2.30645700 |
| C | 9.89534900  | -4.41926500 | -1.35972800 | H | -7.00456700  | -6.32967400 | -1.46645600 |
| C | 8.74150800  | -5.26278500 | -0.98875200 | H | -7.17269000  | -5.84028700 | -3.14608000 |
| C | 9.58780800  | -1.62861900 | 1.09335900  | C | -6.03338800  | -4.45978400 | -1.91431700 |
| H | 8.95616100  | -1.33533200 | 1.92097800  | H | -5.69046200  | -4.45199700 | -0.87936900 |
| C | 11.27097500 | -2.40987000 | -1.02821900 | H | -5.21518500  | -4.11631700 | -2.53898200 |
| C | 11.50680100 | -1.20483800 | -0.31450900 | C | -8.07022700  | -3.43108300 | -1.02938900 |
| H | 12.36409100 | -0.59612000 | -0.59135000 | C | -9.09694200  | -2.36925400 | -1.10058700 |
| C | 10.67823900 | -0.81549600 | 0.72005100  | C | -9.05180600  | -1.40453900 | -2.13780300 |
| H | 10.84247300 | 0.11684200  | 1.24988800  | C | -8.03294600  | -1.45372700 | -3.12237900 |
| C | 10.72634300 | -4.81743700 | -2.39526500 | C | -6.98910200  | -2.49972600 | -3.06476300 |
| H | 10.50793400 | -5.74710000 | -2.91036000 | C | -10.10760100 | -2.32394000 | -0.15347300 |
| C | 12.10019700 | -2.84722200 | -2.09428600 | H | -10.13754000 | -3.09195100 | 0.61271400  |
| H | 12.95529400 | -2.23870600 | -2.37718500 | C | -10.04385800 | -0.38003600 | -2.19568400 |
| C | 11.83352900 | -4.02625900 | -2.76281100 | C | -11.04893400 | -0.34704300 | -1.19200000 |
| H | 12.47776200 | -4.35057800 | -3.57393400 | H | -11.78190300 | 0.45166700  | -1.21919200 |
| O | -2.70858800 | -1.23406700 | -1.69375200 | C | -11.08014700 | -1.30343100 | -0.19601000 |

|   |              |             |             |   |              |             |             |
|---|--------------|-------------|-------------|---|--------------|-------------|-------------|
| H | -11.86091400 | -1.27779700 | 0.55801400  | C | -9.46522200  | 4.80072100  | 2.08750400  |
| C | -8.01494700  | -0.52457200 | -4.15041700 | C | -8.52466100  | 4.17752300  | 1.13057000  |
| H | -7.23091000  | -0.59170800 | -4.89761900 | C | -12.75138400 | 3.84544800  | 0.61065500  |
| C | -9.98996900  | 0.56226300  | -3.25722600 | H | -13.12160000 | 3.30073500  | -0.25156900 |
| H | -10.72885900 | 1.35518900  | -3.28541100 | C | -11.76178300 | 5.27954600  | 2.82951700  |
| C | -9.00114600  | 0.48133400  | -4.21895100 | C | -13.15873200 | 5.14155000  | 2.61498100  |
| H | -8.97707800  | 1.19960800  | -5.03321100 | H | -13.84601300 | 5.60260500  | 3.31949000  |
| O | -1.33477100  | 3.31678000  | -1.43268800 | C | -13.64219300 | 4.43976000  | 1.52802100  |
| O | -10.85655000 | 2.72970400  | -1.17801700 | H | -14.71242000 | 4.34604200  | 1.37272000  |
| O | -7.30506800  | 4.28817600  | 1.23058900  | C | -8.97078200  | 5.52096200  | 3.16309400  |
| N | -2.21964500  | 2.96166600  | -4.30437900 | H | -7.89569300  | 5.61519300  | 3.27545500  |
| N | -3.28928600  | 2.69322700  | -5.00361300 | C | -11.21864500 | 6.00251000  | 3.92395500  |
| N | -4.25192600  | 3.56378800  | -4.62355500 | H | -11.89732600 | 6.46817500  | 4.63377800  |
| N | -9.08775100  | 3.42561900  | 0.08630900  | C | -9.85183200  | 6.12105000  | 4.08576100  |
| C | -1.53027500  | 4.39231900  | -2.38182300 | H | -9.45018900  | 6.68186100  | 4.92405600  |
| H | -0.52952900  | 4.59018400  | -2.77477500 | O | 0.89766400   | -0.02217800 | 1.73766600  |
| H | -1.88895000  | 5.28953800  | -1.86108200 | O | 5.78287700   | 5.81233800  | -2.95327700 |
| C | -2.48199800  | 4.00346900  | -3.46197400 | O | 6.72288600   | 1.67334300  | -1.26949600 |
| C | -3.78700900  | 4.39892300  | -3.66406900 | N | 0.29366200   | -1.46154900 | -1.49273600 |
| H | -4.39259600  | 5.15862200  | -3.19677600 | N | 0.44361400   | -0.95579700 | -2.69842100 |
| C | -5.57912400  | 3.50158600  | -5.24406400 | N | 0.43340200   | 0.37113600  | -2.55712000 |
| H | -5.71009500  | 2.46167800  | -5.55539300 | N | 6.26317000   | 3.75743300  | -2.06981200 |
| H | -5.56956700  | 4.12414900  | -6.14543000 | C | -0.02620400  | -0.73631400 | 0.89428600  |
| C | -6.69715400  | 3.94424400  | -4.29692000 | H | -1.06018800  | -0.52431300 | 1.19221500  |
| H | -7.63454500  | 3.89309000  | -4.86552400 | H | 0.16569800   | -1.78980300 | 1.09313300  |
| H | -6.56638100  | 5.00525900  | -4.04397500 | C | 0.18923100   | -0.46098800 | -0.56617300 |
| C | -6.83004000  | 3.11136200  | -3.01492500 | C | 0.27955600   | 0.72928400  | -1.26070700 |
| H | -5.87588900  | 3.07925000  | -2.47461800 | H | 0.21197900   | 1.76226300  | -0.96644400 |
| H | -7.06850200  | 2.07403500  | -3.28092700 | C | 0.64533700   | 1.23465000  | -3.72325200 |
| C | -7.91455000  | 3.67752300  | -2.09175500 | H | 0.02212300   | 2.11873600  | -3.58307500 |
| H | -8.85800700  | 3.79245900  | -2.63857700 | H | 0.24739800   | 0.69068600  | -4.58202700 |
| H | -7.61375700  | 4.67496200  | -1.74546800 | C | 2.12535100   | 1.57592600  | -3.92285000 |
| C | -8.16258900  | 2.78990400  | -0.87009800 | H | 2.20311700   | 2.14546500  | -4.85771700 |
| H | -8.60554300  | 1.83968600  | -1.17153700 | H | 2.68665200   | 0.64428700  | -4.07337700 |
| H | -7.23705900  | 2.59533400  | -0.33191000 | C | 2.74788600   | 2.38023300  | -2.77610000 |
| C | -10.46208100 | 3.32524600  | -0.17867700 | H | 2.66620300   | 1.81691700  | -1.83626700 |
| C | -11.38202900 | 3.95237200  | 0.79360400  | H | 2.17857200   | 3.31045300  | -2.62943000 |
| C | -10.86451200 | 4.67046200  | 1.90080800  | C | 4.22283800   | 2.70647000  | -3.02685400 |

|   |             |             |             |    |             |             |             |
|---|-------------|-------------|-------------|----|-------------|-------------|-------------|
| H | 4.33211700  | 3.28371000  | -3.95349600 | H  | 4.32627800  | -2.63128700 | -1.53296500 |
| H | 4.78987300  | 1.77573600  | -3.14962000 | C  | 5.44178300  | -1.16341400 | -0.38123100 |
| C | 4.82735100  | 3.50379100  | -1.86997900 | H  | 5.81174700  | -0.68192800 | -1.29180700 |
| H | 4.34612300  | 4.47724700  | -1.78035800 | H  | 6.20366000  | -1.89476600 | -0.09104000 |
| H | 4.71250000  | 2.96816700  | -0.92617200 | C  | 5.28533200  | -0.10202200 | 0.72374700  |
| C | 6.63509000  | 4.99327800  | -2.63766800 | H  | 4.48409000  | -0.39115800 | 1.41473300  |
| C | 8.08589500  | 5.23329100  | -2.80652600 | H  | 4.99119300  | 0.85187200  | 0.28305200  |
| C | 9.02452200  | 4.23961600  | -2.43382600 | C  | 6.59392500  | 0.03842600  | 1.50591400  |
| C | 8.59212600  | 2.99741500  | -1.90450400 | H  | 7.41672200  | 0.19249100  | 0.80257400  |
| C | 7.14942500  | 2.73480200  | -1.72269900 | H  | 6.79126600  | -0.91177900 | 2.01530500  |
| C | 8.51942800  | 6.44684900  | -3.31388700 | C  | 6.64456400  | 1.15267500  | 2.55479100  |
| H | 7.77749100  | 7.18842500  | -3.59119900 | H  | 5.70714600  | 1.23333500  | 3.10467000  |
| C | 10.42094600 | 4.49749500  | -2.57923400 | H  | 7.45026000  | 0.95042200  | 3.26239600  |
| C | 10.82991100 | 5.75328900  | -3.09905500 | C  | 5.85364700  | 3.32460900  | 1.68019900  |
| H | 11.89217600 | 5.95456900  | -3.21162200 | C  | 6.18393800  | 4.66475200  | 1.14785900  |
| C | 9.89769500  | 6.70744500  | -3.45836600 | C  | 7.53578300  | 5.04038300  | 0.94741800  |
| H | 10.22325600 | 7.66276500  | -3.85843800 | C  | 8.58685900  | 4.13207300  | 1.22875700  |
| C | 9.51606000  | 2.03607500  | -1.52923900 | C  | 8.27760600  | 2.76959100  | 1.71152700  |
| H | 9.16667800  | 1.09754400  | -1.11368000 | C  | 5.16253800  | 5.54804200  | 0.83686400  |
| C | 11.34048500 | 3.49217900  | -2.18062300 | H  | 4.13674400  | 5.22776600  | 0.99022300  |
| H | 12.40537600 | 3.68436400  | -2.28472300 | C  | 7.84052300  | 6.33763000  | 0.43507600  |
| C | 10.89530000 | 2.29007600  | -1.66630100 | C  | 6.76801700  | 7.21165900  | 0.12018200  |
| H | 11.60671100 | 1.53014600  | -1.36133900 | H  | 6.99344400  | 8.19223300  | -0.28992300 |
| O | 2.07263800  | -3.57003800 | 4.52639900  | C  | 5.45674200  | 6.82313400  | 0.31396600  |
| O | 4.69270600  | 2.95530200  | 1.85410700  | H  | 4.64727900  | 7.49710100  | 0.05273500  |
| O | 9.13741400  | 1.91184400  | 1.88665700  | C  | 9.90464600  | 4.50886500  | 1.03210000  |
| N | 2.02090300  | -3.43877200 | 1.63819300  | H  | 10.68895100 | 3.79143900  | 1.24559600  |
| N | 2.28710800  | -2.85811200 | 0.49912800  | C  | 9.20306200  | 6.68967100  | 0.24588400  |
| N | 3.61426100  | -2.64222100 | 0.43701800  | H  | 9.44100100  | 7.67237400  | -0.15118500 |
| N | 6.92708000  | 2.48225000  | 1.98276400  | C  | 10.21149400 | 5.79584000  | 0.54467200  |
| C | 3.19018900  | -4.05493800 | 3.75575500  | H  | 11.24855200 | 6.07552700  | 0.39016300  |
| H | 3.08940600  | -5.14028200 | 3.83580400  | Cu | -0.12577200 | -3.37798700 | -1.38340000 |
| H | 4.12722800  | -3.75727800 | 4.24225700  |    |             |             |             |
| C | 3.18218300  | -3.59062100 | 2.33021700  |    |             |             |             |
| C | 4.22262400  | -3.09133400 | 1.56453900  |    |             |             |             |
| H | 5.28999500  | -3.03113600 | 1.73079000  |    |             |             |             |
| C | 4.15702300  | -1.91244100 | -0.72280000 |    |             |             |             |
| H | 3.35777200  | -1.23582200 | -1.03709800 |    |             |             |             |
